21 **Abstract**

22

23 Self-specific CD8<sup>+</sup> T cells often escape clonal deletion, but the properties and  
24 capabilities of such cells in a physiological setting are unclear. We characterized  
25 polyclonal CD8<sup>+</sup> T cells specific for the melanocyte antigen tyrosinase-related protein 2  
26 (Trp2) in mice that express or lack this enzyme due to deficiency in *Dct*, which encodes  
27 Trp2. The size, phenotype, and gene expression profile of the pre-immune Trp2/K<sup>b</sup>-  
28 specific pool were similar in wild-type (WT) and *Dct*-deficient (*Dct*<sup>-/-</sup>) mice. Despite  
29 comparable initial responses to Trp2 immunization, WT Trp2/K<sup>b</sup>-specific cells showed  
30 blunted expansion, and scRNAseq revealed WT cells less readily differentiated into a  
31 CD25<sup>+</sup> proliferative population. Functional self-tolerance clearly emerged when  
32 assessing immunopathology: adoptively transferred WT Trp2/K<sup>b</sup>-specific cells mediated  
33 vitiligo much less efficiently. Hence, CD8<sup>+</sup> T cell self-specificity is poorly predicted by  
34 precursor frequency, phenotype or even initial responsiveness, while deficient  
35 activation-induced CD25 expression and other gene expression characteristics may  
36 help to identify functionally tolerant cells.

37

38

39  
40  
41  
42  
43  
44  
45  
46  
47  
48  
49  
50  
51  
52  
53  
54  
55  
56  
57  
58  
59  
60  
61  
62  
63  
64  
65  
66  
67  
68  
69  
70  
71  
72  
73  
74  
75  
76  
77  
78  
79  
80  
81  
82  
83  
84

## Introduction

Accurate discrimination between harmful (pathogens, toxins, cancerous cells) and non-harmful entities (self, innocuous environmental components, non-pathogenic microbes) underlies effective functioning of the immune system. Understanding the mechanisms that normally enforce immunological tolerance to self is a prerequisite for safely and effectively manipulating the immune system to therapeutically induce or break self-tolerance.

Tolerance can be mediated by the clonal deletion of developing self-reactive T cells (Hogquist et al., 2005; Kappler et al., 1987). Largely based on studies in transgenic mouse models, this process has long been regarded as common and highly efficient (Palmer, 2003). However, recent studies have revealed that thymic clonal deletion is less effective than previously thought (Richards et al., 2016). Self-reactive CD8<sup>+</sup> T cells have been shown to escape negative selection in mice (Bouneaud et al., 2000; Zehn & Bevan, 2006), with one group proposing that up to 4% of peripheral CD8<sup>+</sup> T cells are self-specific (Richards et al., 2015). Furthermore, studies in humans indicated that precursor frequencies of blood CD8<sup>+</sup> T cells specific for certain self-peptides were comparable to those demonstrated for foreign peptides (Yu et al., 2015) and suggested that such cells might be capable of overt autoreactivity if suitably stimulated (Maeda et al., 2014).

Aside from clonal deletion, tolerance mechanisms include ignorance of antigen, suppression by regulatory T cells (Tregs), and induction of a functionally unresponsive or hyporesponsive anergic state (Mescher et al., 2007; Mueller, 2010; Redmond & Sherman, 2005; Schietinger & Greenberg, 2014). However, different models have produced conflicting evidence regarding the contribution of each of these mechanisms and whether non-deletional CD8<sup>+</sup> T cell tolerance is an intrinsic property of tolerant cells (Yu et al., 2015) or dependent on restraint by Tregs (Maeda et al., 2014; Richards et al., 2015). It is also unclear how the presence and reactivity of self-specific CD8<sup>+</sup> T cells relates to their ability to drive immunopathology. The majority of commonly-used mouse models of tolerance have the drawbacks of relying on T cell receptor (TCR) transgenic animals that may not recapitulate normal physiology or utilizing in vitro analyses for characterization of functionality.

Our studies are intended to provide a better understanding of non-deletional CD8<sup>+</sup> T cell tolerance by utilizing a more physiologic and translationally-relevant mouse model in which an epitope from the melanocyte differentiation enzyme tyrosinase-related protein 2 (Trp2) is recognized by CD8<sup>+</sup> T cells as either self or foreign. Tyrosinase-related protein 2, an enzyme involved in melanin biosynthesis encoded by the dopachrome tautomerase (*Dct*) gene, is normally expressed by melanocytes in the skin in both humans and C57BL/6 mice and is overexpressed by many melanomas (Avogadri et al., 2016; Wang et al., 1996). Using wild-type (WT) mice and a novel *Dct*-deficient (*Dct*<sup>-/-</sup>) strain, we compared responses to Trp2<sub>180-188</sub>/K<sup>b</sup> (Trp2/K<sup>b</sup>) as a self-versus foreign antigen. This model is relevant to human health, as Trp2 is a common

85 target in cancer immunotherapy directed against melanoma (Cho & Celis, 2009; Liu et  
86 al., 2014; Parkhurst et al., 1998), and Trp2/K<sup>b</sup>-specific responses can be induced in WT  
87 mice with vigorous priming approaches (Bowne et al., 1999; Byrne et al., 2011; Cho &  
88 Celis, 2009). Instead of utilizing TCR transgenic models, we focus on the polyclonal  
89 Trp2/K<sup>b</sup>-specific CD8<sup>+</sup> T cell repertoire to maximize applicability to normal physiology.

90  
91 Here, we show that tolerance among Trp2/K<sup>b</sup>-specific CD8<sup>+</sup> T cells is manifest primarily  
92 at the level of minimizing overt autoimmunity, with few differences in the size,  
93 phenotype, and initial Trp2 responsiveness of the precursor pool in WT and *Dct*<sup>-/-</sup> mice.  
94 The underlying tolerance mechanism does not depend on cell-extrinsic regulation but  
95 rather correlates with a cell-intrinsic failure of WT Trp2/K<sup>b</sup>-specific CD8<sup>+</sup> T cells to  
96 sustain optimal proliferation. However, while differences in the responsiveness of WT  
97 and *Dct*<sup>-/-</sup> cells to Trp2 immunization were mostly subtle, a notable difference emerged  
98 when the cells were assessed for their ability to provoke autoimmune vitiligo: cells  
99 primed in *Dct*<sup>-/-</sup> mice were much more effective than those primed in WT animals.  
100 Accordingly, we conclude that tolerance does not markedly impact the presence,  
101 phenotype, or initial reactivity of Trp2/K<sup>b</sup>-specific CD8<sup>+</sup> T cells but severely limits  
102 whether these cells are capable of overt autoreactivity. Moreover, our polyclonal model  
103 reveals that certain characteristics of Trp2/K<sup>b</sup>-responsive effector cells— reduced CD25  
104 expression and impaired differentiation into a highly proliferative subpopulation —  
105 correlate with functional tolerance of a T cell population, providing a framework for  
106 future characterization of self-specific CD8<sup>+</sup> T cells.

107  
108

109  
110  
111  
112  
113  
114  
115  
116  
117  
118  
119  
120  
121  
122  
123  
124  
125  
126  
127  
128

## Results

### The pre-immune population of Trp2/K<sup>b</sup>-specific cells is similarly sized and appears naïve in WT and *Dct*<sup>-/-</sup> mice

Clonal deletion is a well-studied tolerance mechanism that may result in the near-total culling of self-specific cells or at least a marked reduction and reduced apparent TCR affinity of surviving self-specific cells (Bouneaud et al., 2000; Cheng & Anderson, 2018; Enouz et al., 2012; Hogquist et al., 2005; Zehn & Bevan, 2006). We assessed the number and phenotype of Trp2/K<sup>b</sup>-specific cells in pre-immune (naïve) mice to examine deletional central tolerance in our model. For mice in which Trp2 would not be a self-antigen, we used a novel *Dct*<sup>-/-</sup> strain that carries a large deletion encompassing the exon encoding Trp2<sub>180-188</sub>, unlike a previously described *Dct*-targeted strain that retains the coding sequence for that epitope (Guyonneau et al., 2004). We performed tetramer enrichment from the spleen and lymph nodes of pre-immune WT and *Dct*<sup>-/-</sup> mice to quantify the number of Trp2/K<sup>b</sup>-specific CD8<sup>+</sup> T cell precursors (Figure 1A, S1A). While we identified slightly more antigen-specific cells in *Dct*<sup>-/-</sup> mice, we nevertheless found relatively large numbers of Trp2/K<sup>b</sup>-specific CD8<sup>+</sup> T cells (> 1500) in both strains, evidence that most Trp2/K<sup>b</sup>-specific cells escape thymic or peripheral clonal deletion in WT mice.

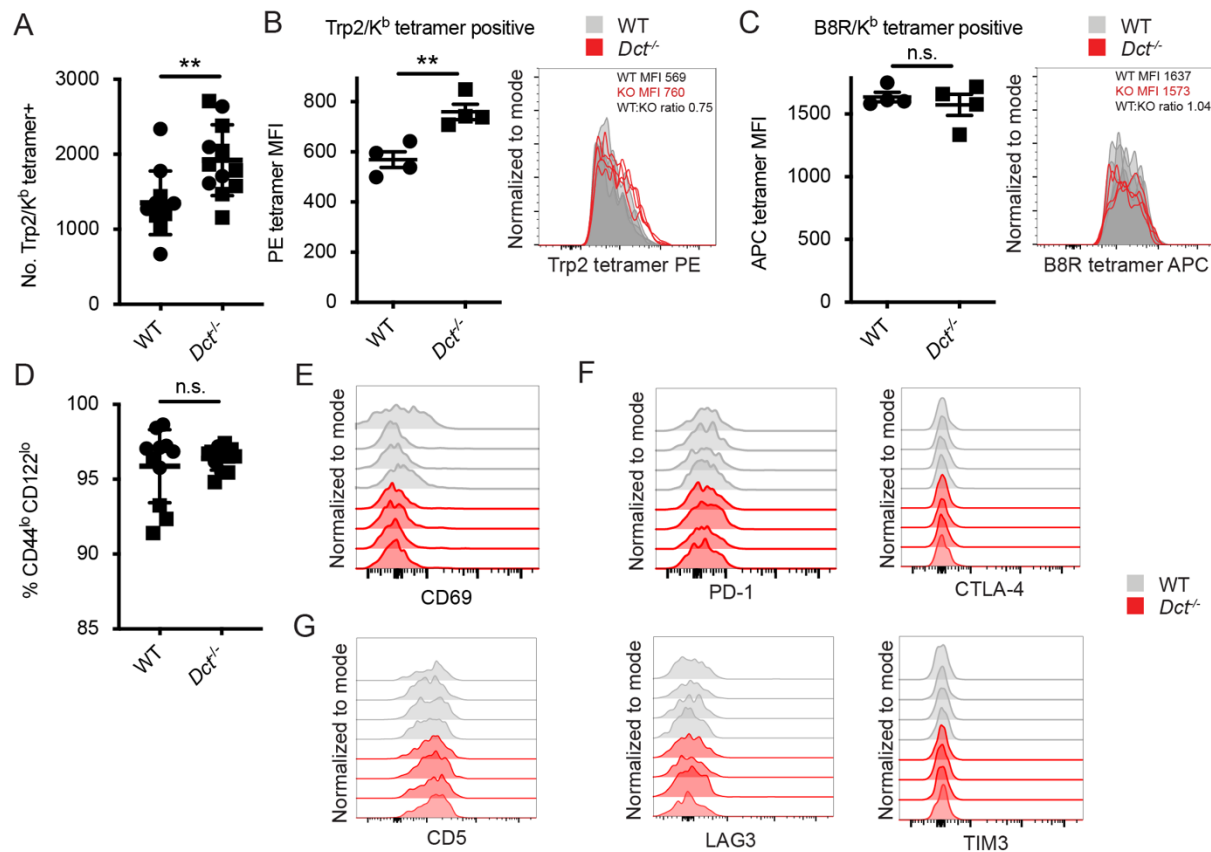

**Figure 1. Trp2/K<sup>b</sup>-specific CD8<sup>+</sup> T cells in pre-immune WT and *Dct*<sup>-/-</sup> mice share a naïve phenotype while showing modest differences in frequency and tetramer staining**

Tetramer enrichment was performed to enumerate Trp2/K<sup>b</sup>-specific CD8<sup>+</sup> T cells per mouse (A). Median tetramer fluorescence intensity (MFI) was used to estimate the avidity of enriched Trp2/K<sup>b</sup>-specific (B) or B8R/K<sup>b</sup>-specific cells (C). (D) CD44/CD122 expression of Trp2/K<sup>b</sup>-specific cells. (E) CD69 expression of Trp2/K<sup>b</sup>-specific cells. (F) PD-1, CTLA-4, LAG3, and TIM3 expression of Trp2/K<sup>b</sup>-specific cells. (G) CD5 expression of Trp2/K<sup>b</sup>-specific cells. Data are compiled from three independent experiments in A and D. Four WT and *Dct*<sup>-/-</sup> mice are shown in B and C; results are representative of other experiments. The graphs in Figures 1E–G represent individual experiments with four mice per group. Squares indicate male animals. \*\*  $p < 0.01$  by unpaired t test.

129

130

131 In some systems, T cells bearing TCRs with low affinity for self-antigens avoid deletion;  
132 low affinity TCRs can often be identified by reduced peptide/MHC tetramer binding to  
133 these cells (Bouneaud et al., 2000; Daniels & Jameson, 2000; Daniels et al., 2006;  
134 Enouz et al., 2012; Hogquist et al., 2005; Zehn & Bevan, 2006; Zehn et al., 2009). We  
135 compared the Trp2/K<sup>b</sup> tetramer median fluorescence intensity (MFI) in pre-immune WT  
136 and *Dct*<sup>-/-</sup> mice. The average Trp2/K<sup>b</sup> tetramer staining was higher on *Dct*<sup>-/-</sup> cells, but the  
137 MFI largely overlapped between the two populations (Figure 1B), suggesting that the  
138 range of TCR avidities did not markedly differ between the Trp2/K<sup>b</sup>-specific pools.  
139 Indeed, the tetramer staining differences we observed (a WT:*Dct*<sup>-/-</sup> tetramer MFI ratio of  
140 ~0.75) are more subtle than that noted in a previous study using a transgenic mouse  
141 model, which reported a tetramer ratio of ~0.35 between mice with vs. without self-  
142 antigen expression (Bouneaud et al., 2000). As a control, we also assessed the avidity  
143 of cells specific for an irrelevant foreign epitope—B8R/K<sup>b</sup> from vaccinia virus—in WT  
144 and *Dct*<sup>-/-</sup> mice; the tetramer MFI of B8R/K<sup>b</sup>-specific cells was comparable between the  
145 strains (Figure 1C).

146

147 We also examined the phenotype of Trp2/K<sup>b</sup>-specific cells in pre-immune WT and *Dct*<sup>-/-</sup>  
148 mice. No consistent differences in the expression of activation/memory markers (CD69,  
149 CD44, CD122) or anergy/exhaustion markers (PD-1, LAG3, CTLA-4, TIM3) were  
150 identified between *Dct*<sup>-/-</sup> and WT Trp2/K<sup>b</sup>-specific cells (Figures 1C–F, S1B, S1C). The  
151 majority of cells exhibited low expression of the memory markers CD44 and CD122,  
152 and anergy/exhaustion marker expression was low in both populations. CD5 can  
153 indicate self-antigen recognition (Azzam et al., 1998; Fulton et al., 2015), but we did not  
154 detect significant differences in expression between the groups (Figure 1G). RNAseq  
155 analysis of Trp2/K<sup>b</sup> tetramer-binding cells isolated from pre-immune mice by  
156 fluorescence-activated cell sorting (FACS) showed no consistent differences in gene  
157 expression related to their derivation from WT versus *Dct*<sup>-/-</sup> mice (Supplemental figure  
158 1D), although this does not rule out the possibility of epigenetic differences between the  
159 populations.

160

161 To ensure our findings were not unique to Trp2<sub>180</sub>/K<sup>b</sup>-specific cells, we used tetramer  
162 enrichment to isolate CD8<sup>+</sup> T cells specific for other skin antigens—a distinct Trp2  
163 epitope (Trp2<sub>363</sub>/D<sup>b</sup>) and a tyrosinase-related protein 1 epitope (Trp1<sub>455</sub>/D<sup>b</sup>)—in mice  
164 expressing or lacking these antigens. We were able to identify cells with these  
165 specificities present at numbers similar to slightly less in mice expressing antigen

166 relative to mutant mice (Supplemental figure 1E). This suggests that CD8+ T cells  
167 specific for other melanocyte self-epitopes also largely escape clonal deletion.

168  
169 Hence, although we identified some minor differences between Trp2/K<sup>b</sup>-specific cells  
170 from WT versus *Dct*<sup>-/-</sup> mice, these pre-immune populations generally resembled each  
171 other in number, phenotype, and gene expression, arguing against a major role for  
172 clonal deletion or overt steady-state anergy induction as tolerance mechanisms to this  
173 antigen. These findings resonate with studies in humans, which have shown that the  
174 precursor frequency and peptide/MHC tetramer staining intensity were only modestly  
175 reduced for a self- versus non-self antigen (Yu et al., 2015) and that self-specific cells  
176 can be phenotypically naïve (Maeda et al., 2014; Yu et al., 2015). Accordingly, these  
177 data suggested that analysis of the Trp2/K<sup>b</sup>-specific responses in mice could serve as a  
178 useful model to investigate the basis for and limits of non-deletional self-tolerance.

179  
180 *WT Trp2/K<sup>b</sup>-specific CD8+ T cells display impaired responses to Trp2 immunization*

181  
182 It was possible that the lack of substantial clonal deletion or signs of prior activation in  
183 WT Trp2/K<sup>b</sup>-specific cells indicated “ignorance” of Trp2 and/or that the Trp2<sub>180</sub> epitope,  
184 which shows suboptimal binding to K<sup>b</sup> (McWilliams et al., 2006), was unable to prime a  
185 vigorous immune response. To investigate this, we challenged WT and *Dct*<sup>-/-</sup> mice with  
186 Trp2 in an immunogenic context using TriVax, a subunit immunization strategy  
187 comprising peptide, agonist anti-CD40 antibody, and poly(I:C) (Cho & Celis, 2009). It  
188 should be noted that the TriVax approach uses the minimal peptide for priming, which  
189 likely excludes antigen-specific Treg involvement. We included B8R peptide in addition  
190 to Trp2 peptide in these experiments as an internal control. While WT and *Dct*<sup>-/-</sup> mice  
191 responded similarly to B8R, WT mice showed a more limited response to Trp2 at an  
192 effector time point (day 7) relative to *Dct*<sup>-/-</sup> mice (Figure 2A, B), ruling out ignorance as  
193 the dominant tolerance mechanism. We observed a significantly larger number and  
194 frequency of Trp2/K<sup>b</sup>-specific cells in *Dct*<sup>-/-</sup> mice, and the *Dct*<sup>-/-</sup> cells exhibited higher  
195 apparent Trp2/K<sup>b</sup> avidity (as measured by tetramer MFI; Figure 2C–E). Still, WT  
196 Trp2/K<sup>b</sup>-specific cells expanded > 1000-fold (*Dct*<sup>-/-</sup> cells expanded ~4000-fold). The  
197 WT:*Dct*<sup>-/-</sup> tetramer ratio was little changed relative to the pre-immune populations,  
198 suggesting the difference in avidity between WT and *Dct*<sup>-/-</sup> cells had not been amplified  
199 by activation. The frequency of PD-1+ cells was comparable between WT and *Dct*<sup>-/-</sup>  
200 Trp2/K<sup>b</sup>-specific populations at this time point (Figure 2F), suggesting similar exposure  
201 to antigen.

202  
203 To ensure that our results were not specific to the TriVax system, we also infected mice  
204 with a recombinant *Listeria monocytogenes* strain expressing Trp2 (LmTrp2) (Bruhn et  
205 al., 2005) and sacrificed the mice at effector (day 7) and memory (day 45) time points,  
206 assessing the percentage and number of Trp2/K<sup>b</sup>-specific CD8+ T cells and cytokine  
207 production in response to ex vivo Trp2 stimulation. Again, the Trp2/K<sup>b</sup>-specific response  
208 was greater in *Dct*<sup>-/-</sup> mice at both effector and memory time points (Supplemental figures  
209 2A–C). Similarly, the frequency of all CD8+ T cells responding to ex vivo Trp2  
210 stimulation with cytokine production (IFN-γ, TNF-α) was larger in *Dct*<sup>-/-</sup> mice; the percent  
211 producing IFN-γ approximated the tetramer-positive population, suggesting that the

212 majority of Trp2/K<sup>b</sup>-specific cells were able to produce this cytokine in both strains of  
 213 mice (Supplemental figure 2D). Among IFN- $\gamma$ -producing cells, those from *Dct*<sup>-/-</sup> mice  
 214 tended to produce increased amounts of cytokine on a per-cell basis (as assessed by  
 215 IFN- $\gamma$  MFI).  
 216

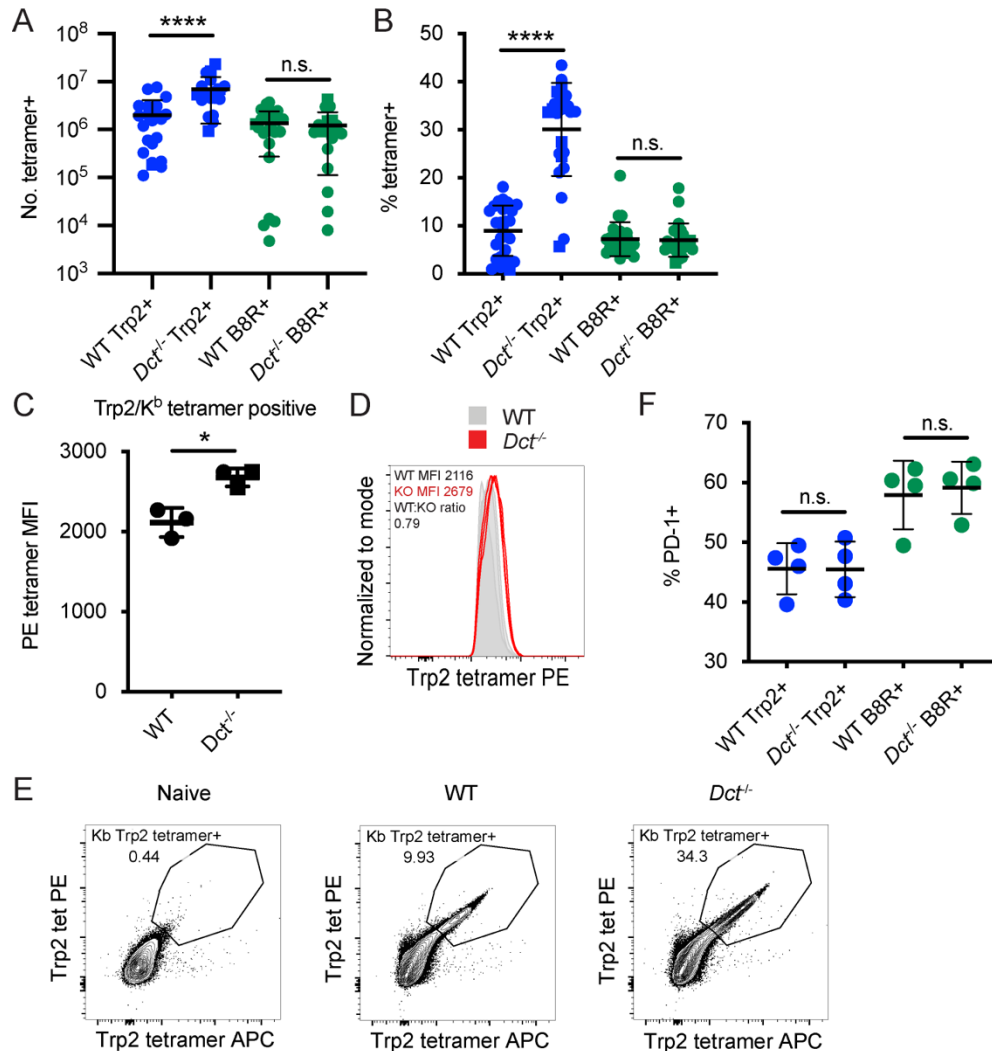

217  
 218 **Figure 2. WT and *Dct*<sup>-/-</sup> Trp2/K<sup>b</sup>-specific cells respond differently to immunization with Trp2**  
 219 Mice were primed with TriVax (50 ug each of Trp2 and B8R peptides; A–F). The number (A) or percent  
 220 (B) of splenic Trp2/K<sup>b</sup> or B8R/K<sup>b</sup>-specific cells was assessed at the day seven. (C, D) The tetramer  
 221 fluorescence intensity of splenic Trp2/K<sup>b</sup>-specific cells was compared. (E) Gating for dual Trp2/K<sup>b</sup>  
 222 tetramer positive CD8<sup>+</sup>. (F) The frequency of the indicated splenic population expressing PD-1 is  
 223 shown. Data in A and B are compiled from more than three experiments. Data in C–F are representative  
 224 of three or more similar experiments. Squares indicate male animals. \*  $p < 0.05$ , \*\*\*\*  $p < 0.0001$  by  
 225 unpaired t test (C) or one-way ANOVA with Sidak’s multiple comparisons test (A, B, F).  
 226

227 Tolerance to Trp2/K<sup>b</sup> is CD8<sup>+</sup> T cell-intrinsic

228 Both cell-intrinsic and cell-extrinsic mechanisms of CD8<sup>+</sup> T cell tolerance have been  
 229 previously described. Sakaguchi’s group (Maeda et al., 2014) identified anergic CD8<sup>+</sup> T  
 230 cells specific for melanocyte antigens in healthy human donors and concluded that



231 these cells were restrained by Tregs. In contrast, other groups have shown cell-intrinsic  
 232 deficits among self-reactive CD8+ T cells. For example, Davis' group (Yu et al., 2015)  
 233 found human self-antigen-specific T cells to be poorly responsive to antigenic  
 234 stimulation even in the absence of Tregs, and Greenberg and colleagues (Schietinger et  
 235 al., 2012) showed that tolerant self-reactive murine CD8+ T cells remained tolerant  
 236 when transferred into new hosts that lacked antigen expression.  
 237

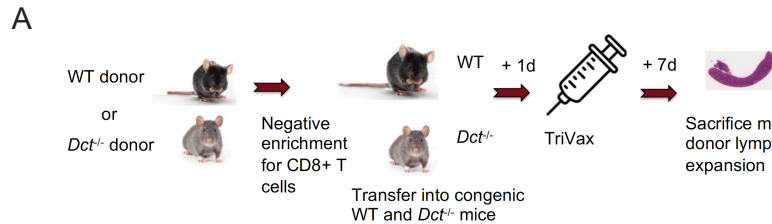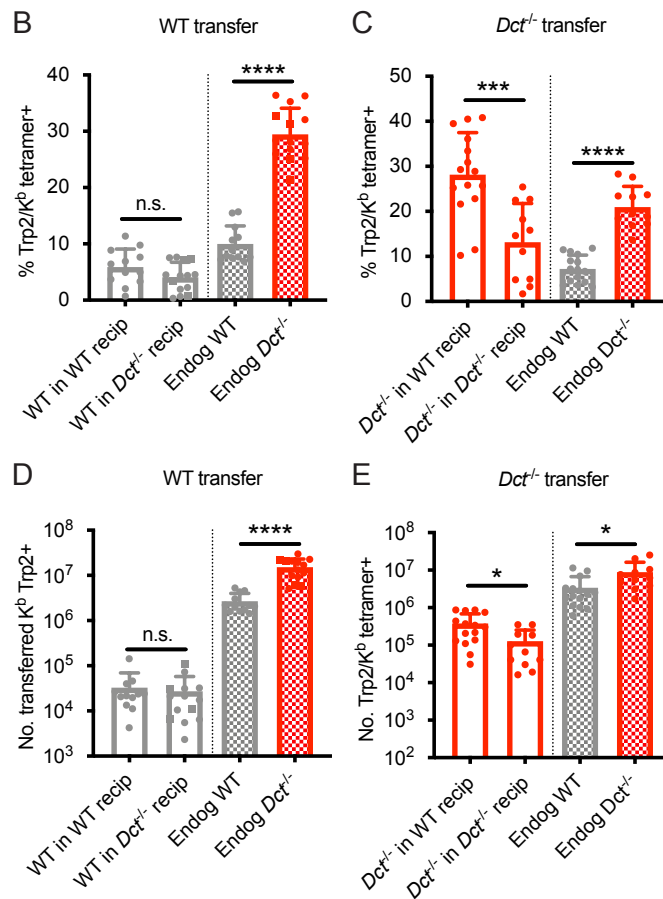

**Figure 3. WT Trp2/K<sup>b</sup>-specific cells exhibit cell-intrinsic tolerance**

(A) We performed negative enrichment for CD8+ T cells from WT or *Dct*<sup>-/-</sup> donors and transferred bulk CD8+ T cells into congenically distinct WT or *Dct*<sup>-/-</sup> recipients. One day later, mice were immunized with TriVax (100 ug of Trp2 and B8R peptide). Donor and endogenous cells were collected from the spleens of recipient mice on day seven following immunization and assessed for the percent (B, C) and number (D, E) of Trp2/K<sup>b</sup>-binding cells. Data in B–E were compiled from three or more experiments. Squares indicate male animals. \* p < 0.05, \*\*\* p < 0.001, \*\*\*\* p < 0.0001 by one-way ANOVA with Sidak's multiple comparisons test. Endog, endogenous; recip, recipients.

238 Accordingly, we investigated whether cell-intrinsic or -extrinsic mechanisms were active  
 239 in restraining Trp2/K<sup>b</sup>-specific CD8+ T cells in WT mice. To assess this, we transferred  
 240 bulk WT polyclonal CD8+ T cells to both WT and *Dct*<sup>-/-</sup> recipients, then primed the mice  
 241 with TriVax and examined the effector response at day 7 post-immunization (Figure 3A,  
 242 3B, 3D). Transferred WT Trp2/K<sup>b</sup>-specific cells did proliferate (~100-fold expansion),  
 243 albeit to a much lesser degree than endogenous *Dct*<sup>-/-</sup> Trp2/K<sup>b</sup>-specific cells.  
 244 Importantly, their expansion was comparable in both WT and *Dct*<sup>-/-</sup> recipients (Figure

245 3B, D), suggesting that the WT CD8<sup>+</sup> T cells remained hyporesponsive even in an  
246 environment where endogenous cells were not tolerant to Trp2, supporting a cell-  
247 intrinsic basis for the impaired reactivity of WT Trp2/K<sup>b</sup>-specific CD8<sup>+</sup> T cells.  
248

249 We also assessed the performance of *Dct*<sup>-/-</sup> CD8<sup>+</sup> T cells when transferred into *Dct*<sup>-/-</sup>  
250 and WT hosts prior to priming to determine whether they would acquire tolerance in the  
251 WT environment (Figure 3A). These Trp2/K<sup>b</sup>-specific donor cells were able to expand  
252 robustly in both *Dct*<sup>-/-</sup> and WT recipients (Figure 3C, E), further demonstrating a lack of  
253 extrinsic regulation in the WT environment. *Dct*<sup>-/-</sup> cells actually performed better in WT  
254 recipients than in *Dct*<sup>-/-</sup> recipients; the basis for this outcome is not clear but could be  
255 due to reduced competition by endogenous Trp2/K<sup>b</sup>-specific cells in WT hosts.  
256 Preliminary studies indicated that *Dct*<sup>-/-</sup> cells still showed strong expansion when the  
257 interval between cell transfer and TriVax was extended from one day to one week,  
258 suggesting that these cells did not acquire tolerance characteristics within this  
259 timeframe (data not shown).  
260

261 We conducted similar transfers utilizing LmTrp2 instead of TriVax, again finding  
262 evidence of cell-intrinsic tolerance. The transferred cells behaved in accordance with  
263 the donors' Trp2 expression rather than that of the recipients: WT cells remained  
264 tolerant when primed in *Dct*<sup>-/-</sup> recipients, while *Dct*<sup>-/-</sup> cells retained the ability to expand  
265 when primed in WT recipients (Supplemental figure 2E, 2F). Collectively, these data  
266 indicate that cell-intrinsic mechanism(s) enforce tolerance among WT Trp2/K<sup>b</sup>-specific  
267 cells.  
268

### 269 WT Trp2/K<sup>b</sup>-specific cells are capable of an acute response to Trp2

270

271 Although the response to Trp2 immunization was weaker in WT versus *Dct*<sup>-/-</sup> mice, the  
272 WT response was still substantial (Figure 2A). Studies on T cells with low affinity TCRs  
273 have shown a normal initial proliferative response that stalls prematurely relative to the  
274 response by high affinity T cells (Enouz et al., 2012; Ozga et al., 2016; Zehn et al.,  
275 2009). Alternatively, it was possible that fewer clones would be recruited into the Trp2  
276 response in WT mice, leading to decreased expansion relative to *Dct*<sup>-/-</sup> animals from the  
277 initiation of an immune response. To distinguish between these possibilities, we studied  
278 the expansion kinetics of the Trp2/K<sup>b</sup>-specific response in WT and *Dct*<sup>-/-</sup> mice. In order  
279 to track early polyclonal responses, TriVax with a higher dose of Trp2 peptide was used  
280 in these studies, and tetramer enrichment was used to isolate Trp2/K<sup>b</sup>-specific cells.  
281 Interestingly, WT Trp2/K<sup>b</sup>-specific cells were capable of an initial response that largely  
282 paralleled that shown by their *Dct*<sup>-/-</sup> counterparts (Figure 4A). One day after TriVax  
283 immunization, few cells were isolated, likely due to either trapping within the tissues  
284 (Weninger et al., 2001) or TCR downregulation (Cai et al., 1997). Slightly more Trp2/K<sup>b</sup>-  
285 specific cells were identified in WT mice on day two, while increased numbers of  
286 Trp2/K<sup>b</sup>-specific cells were seen in *Dct*<sup>-/-</sup> mice on days three through five. By days six  
287 and seven after high dose TriVax immunization, Trp2/K<sup>b</sup>-specific cells in *Dct*<sup>-/-</sup> mice  
288 outnumbered those in WT mice by an average ratio of 4:1. Although significant, these  
289 differences in expansion were modest in comparison with the > 1000-fold expansion of  
290 Trp2/K<sup>b</sup>-specific cells in both strains (Figure 4A). Preliminary assessment of apoptosis

291 induction (annexin V staining) showed no differences between the strains at one or  
 292 three days after TriVax (data not shown).

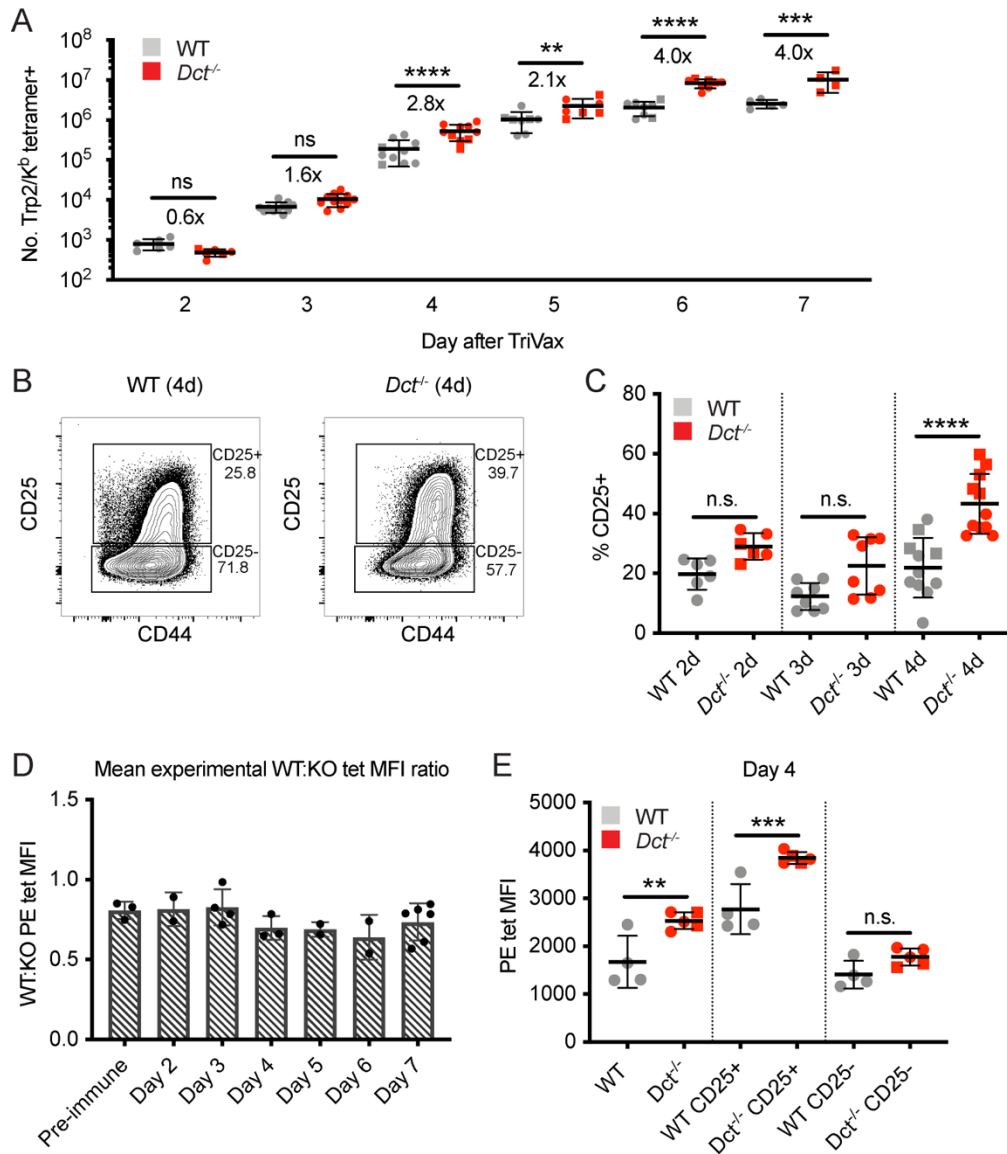

**Figure 4. WT Trp2/K<sup>b</sup>-specific cells are capable of an initial response to Trp2 similar to that of *Dct*<sup>-/-</sup> cells**

WT and *Dct*<sup>-/-</sup> mice received intravenous injections of TriVax with 200 ug Trp2 peptide. Tetramer enrichment was used to enumerate Trp2/K<sup>b</sup>-specific cells and assess their phenotype at the indicated time points following immunization (A–C, E). The ratio between the mean experimental PE MFI of Trp2/K<sup>b</sup>-specific cells in WT mice relative to *Dct*<sup>-/-</sup> mice is plotted in D, with each symbol representing one experiment. Data are compiled from three or more experiments in A, D, and E. Representative flow plots from one day four experiment are shown in B, and the same representative day four experiment is shown in E. Squares indicate male animals; the dotted line indicates the average naïve precursor frequency from the spleen and lymph nodes. \* p < 0.05, \*\* p < 0.01, \*\*\* p < 0.001, \*\*\*\* p < 0.0001 by one-way ANOVA with Sidak’s multiple comparisons test (performed on log-transformed data in [a]).

294 We also assessed the phenotype of responding Trp2/K<sup>b</sup>-specific cells acutely after  
295 TriVax. With this approach, CD69 did not serve as a reliable indicator of activation due  
296 to the type I interferon response induced by poly(I:C) leading to CD69 upregulation  
297 (Shiow et al., 2006), and widespread CD44 expression was seen in both tetramer  
298 positive and negative cells because of the potent inflammatory response unleashed by  
299 this method of immunization. Accordingly, we tracked CD25 expression as an indicator  
300 of activation. CD25, the high affinity alpha component of the IL-2 receptor, is  
301 upregulated with activation in certain situations (Valenzuela et al., 2002) and may  
302 enable a stronger effector response by cells expressing it (Obar et al., 2010). The  
303 proportion of Trp2/K<sup>b</sup>-specific cells expressing CD25 was significantly greater in *Dct*<sup>-/-</sup>  
304 mice on day four, and trended higher on days two and three (Figure 4B, 4C). The CD25  
305 MFI of CD25<sup>+</sup> cells was also higher on *Dct*<sup>-/-</sup> Trp2/K<sup>b</sup>-specific cells on day four (Figure  
306 4B), suggesting that *Dct*<sup>-/-</sup> cells expressed more CD25 on a per-cell basis. Once again,  
307 *Dct*<sup>-/-</sup> Trp2/K<sup>b</sup>-specific cells displayed significantly higher tetramer MFI than WT cells on  
308 days two through seven, but the avidity differences detected by tetramer staining did not  
309 demonstrate a progressive increase with time; the ratio between the WT and *Dct*<sup>-/-</sup>  
310 tetramer MFI transiently dropped at days 4–6, but the ratio at day 7 was similar to that  
311 of pre-immune cells (Figure 4D, S3A). Tetramer MFI was highest among the CD25<sup>+</sup>  
312 subset for both WT and *Dct*<sup>-/-</sup> cells; the tetramer MFI of CD25<sup>+</sup> WT cells was similar to  
313 the MFI of the overall tetramer-binding *Dct*<sup>-/-</sup> population on day four (Figure 4E).

314  
315 We also assessed the early response following peptide stimulation alone, since this  
316 would be analogous to encountering Trp2 in a non-inflammatory context. We again  
317 found the early response to be similar between WT and *Dct*<sup>-/-</sup> Trp2/K<sup>b</sup>-specific cells. The  
318 number (Supplemental figure 3B) and phenotype of WT Trp2/K<sup>b</sup>-specific cells was  
319 comparable to that of *Dct*<sup>-/-</sup> cells on day one post-peptide. The activation markers CD44  
320 and CD69 were similarly upregulated in both (Supplemental figure 3C, 3D), however,  
321 responses began to diverge by day two after peptide stimulation, and by day three  
322 significant differences in number and CD44 expression had emerged, with *Dct*<sup>-/-</sup> cells  
323 clearly outperforming WT cells (Supplemental figure 3B, 3C).

324  
325 These findings indicate that the response to Trp2/K<sup>b</sup> in WT and *Dct*<sup>-/-</sup> mice follows  
326 similar kinetics and magnitude but that expansion in WT animals terminates  
327 prematurely. Interestingly, we did not observe a progressive increase in apparent TCR  
328 avidity over time among the *Dct*<sup>-/-</sup> responder pool relative to WT cells, as might be  
329 expected if the subset of *Dct*<sup>-/-</sup> T cells with higher avidity TCRs became more dominant  
330 in the response to Trp2/K<sup>b</sup>.

331  
332 Single-cell sequencing reveals an impaired ability to differentiate into a highly  
333 proliferative population among WT Trp2/K<sup>b</sup>-specific cells

334  
335 To better understand the defects in expansion and functionality observed among WT  
336 Trp2/K<sup>b</sup>-specific cells and assess the heterogeneity within this population, we performed  
337 single-cell RNA sequencing on Trp2/K<sup>b</sup>-specific cells from WT and *Dct*<sup>-/-</sup> mice at day  
338 three after TriVax priming. After initial data processing, the WT and *Dct*<sup>-/-</sup> datasets were  
339 merged (Stuart et al., 2019); clusters based on the cells' transcriptomes were generated

340 in an unbiased manner and visualized using uniform manifold approximation and  
341 projection (UMAP). Cells clustered into two major groups separated along the x-axis,  
342 each comprised of smaller clusters (Figure 5A). Interestingly, over half of the cells  
343 (58%) from *Dct*<sup>-/-</sup> mice were localized in cluster 0, but this cluster was nearly devoid of  
344 WT cells, representing only a small subset (13%) of WT cells (Figure 5B). Suspecting  
345 that this cluster might contain a more functional subset poorly represented in the WT  
346 population, we assessed its characteristics in more detail. Because this cluster made up  
347 the majority of Group A (left group), we performed differential gene expression analysis  
348 between the two major groups in the merged dataset: A and B (right group).

349  
350 Histone genes (e.g., *Hist1h1b*, *Hist1h1e*, *Hist1h1d*, *Hist2h2ac*) were among the most  
351 upregulated in Group A compared to Group B; these genes are commonly induced in  
352 association with cellular replication (Mei et al., 2017). Other genes associated with  
353 proliferation, such as *Myc*, *Nolc1*, *Npm1*, and *Ccne2*, were also upregulated in Group A  
354 (Figure 5C), and cell cycle analysis revealed that the majority of cells in Group A were in  
355 stages G2/M or S of the cell cycle (Figure 5D). Among cells in cluster 0 (Group A), 76%  
356 of *Dct*<sup>-/-</sup> cells were in G2/M or S versus 42% of WT cells (Figure 5E). Gene set  
357 enrichment analysis revealed a strong enrichment of gene sets comprising *Myc* targets,  
358 E2F targets, and genes related to mTORC1 signaling and the G2/M checkpoint  
359 (Supplemental figure 4A).

360  
361 Many of the cells in Group A expressed CD25, with the majority of the remainder  
362 located in cluster 2 of Group B (Figure 5F); cells in these clusters also showed  
363 enrichment for a gene signature associated with IL-2 receptor signaling (Supplemental  
364 figure 4B). This aligns with our finding that the frequency of cells expressing CD25 was  
365 greater in *Dct*<sup>-/-</sup> than WT Trp2/K<sup>b</sup>-specific effectors (Figure 4C). Indeed, group A cells  
366 showed significantly higher expression of certain genes relevant to the IL-2 signaling  
367 pathway with known impacts on T cell function, such as *Irf4* and *Myc*; previous work has  
368 demonstrated that signaling through the IL-2 receptor is important for sustained *Myc*  
369 expression (Preston et al., 2015). Based on these data, we administered IL-2 complex  
370 (IL-2 + anti-IL-2 S4B6 antibody) treatment to WT and *Dct*<sup>-/-</sup> mice previously primed with  
371 TriVax to determine whether this would correct the defective proliferation of the WT  
372 Trp2/K<sup>b</sup>-specific cells. IL-2 complex acts through the  $\beta$  and  $\gamma$  components of the IL-2  
373 receptor, negating the impact of differential CD25 expression. IL-2 complex treatment  
374 on day five after TriVax or LmTrp2 improved the expansion of both WT and *Dct*<sup>-/-</sup>  
375 Trp2/K<sup>b</sup> specific cells to a similar extent (Supplemental figure 4C, 4D). Although this  
376 treatment did not correct the expansion defect of WT Trp2/K<sup>b</sup>-specific cells in a selective  
377 manner, it did improve their numbers to the level seen among untreated *Dct*<sup>-/-</sup> cells,  
378 supporting the use of IL-2R-directed therapies in cancer immunotherapy designed to  
379 engage tolerant cells (Moynihan et al., 2016; Rosenberg, 2014; Waithman et al., 2008).

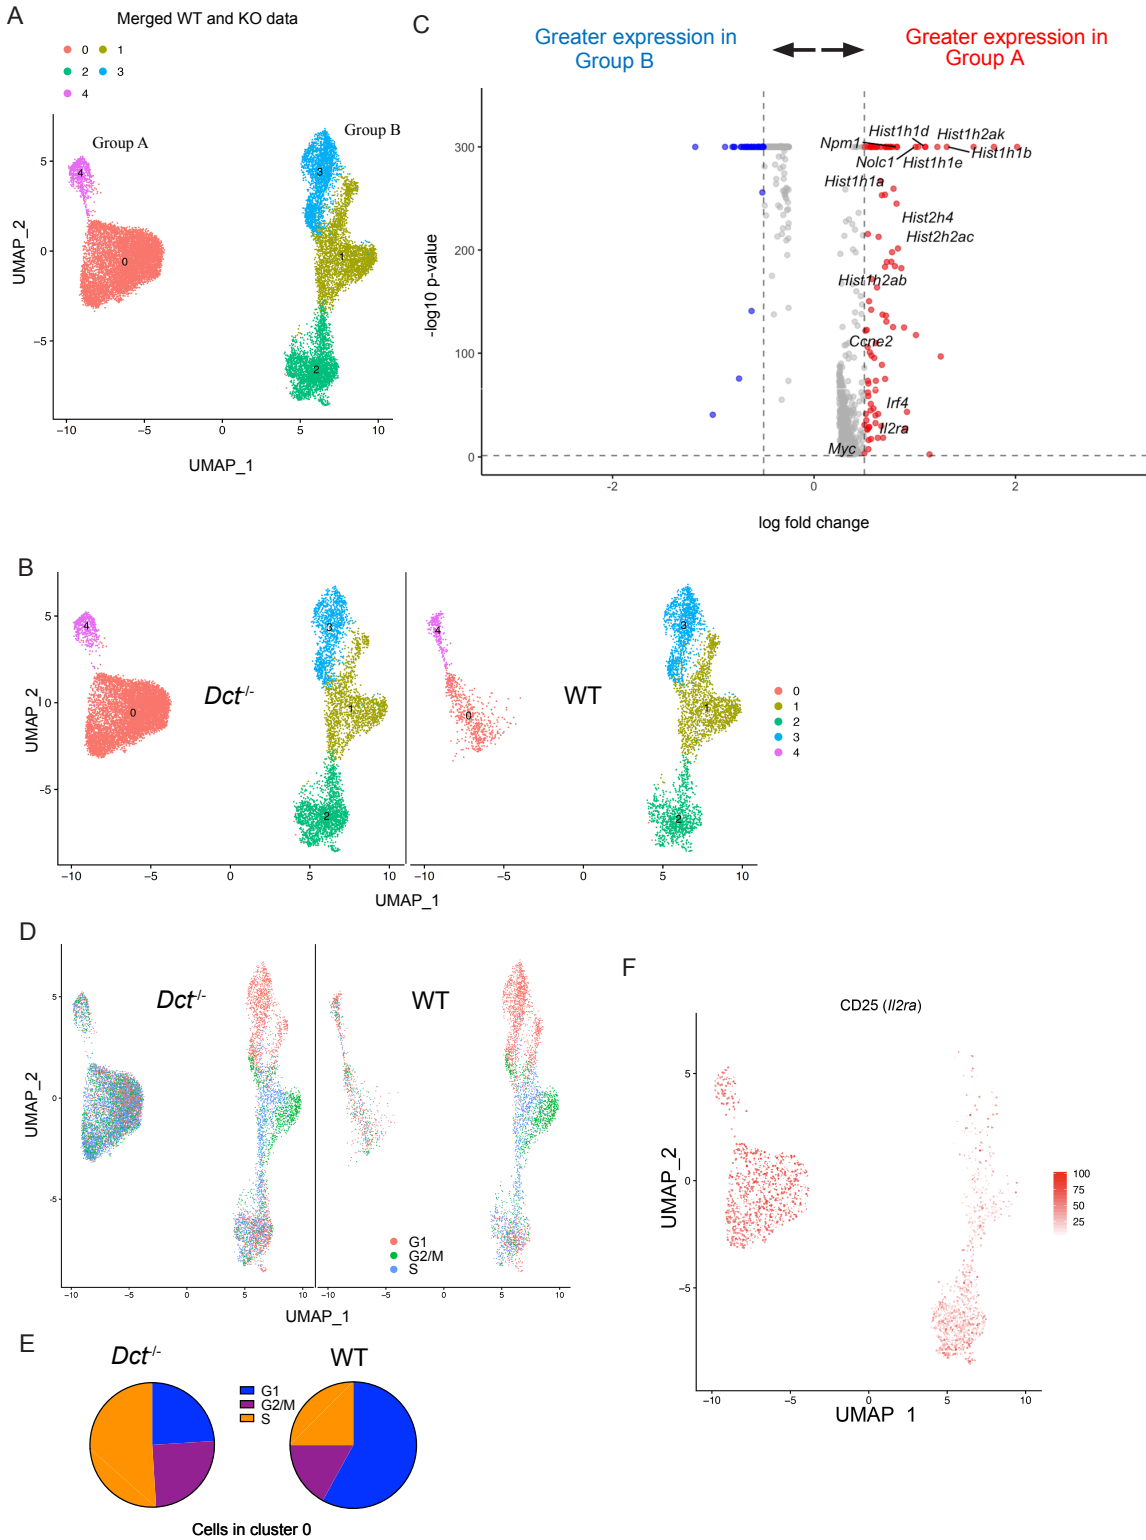

**Figure 5. WT Trp2/K<sup>b</sup>-specific cells show proliferative defects in the early effector phase**

Trp2/K<sup>b</sup>-specific CD8<sup>+</sup> T cells were isolated from WT and *Dct*<sup>-/-</sup> mice on day three after TriVax and submitted for scRNA-seq. After initial processing, the WT and *Dct*<sup>-/-</sup> data sets were merged and further analyzed. (A) UMAP representation of gene expression from merged datasets determined using Seurat; each dot represents one cell. Clusters are indicated by color. (B) Cells from the *Dct*<sup>-/-</sup> sample are shown on the left and cells from the WT sample on the right using the same UMAP projection (generated from merged data) shown in Fig. 6A. (C) The most differentially expressed genes between groups A and B (see Fig. 6A); histone genes and other genes associated with proliferation are indicated. A positive average log fold change value indicates higher expression in group A. (D) Cell cycle analysis indicates the cell cycle phase for each cell on the UMAP plot (cells from the *Dct*<sup>-/-</sup> sample are shown on the left and cells from the WT sample on the right). (E) Pie charts show the frequencies of cells within cluster 0 in each stage of the cell cycle (left: *Dct*<sup>-/-</sup> sample, right: WT sample). (F) Expression of CD25 (*Ii2ra*) by cell is indicated on the clusters by color.

381

382 Taken as a whole, the RNA-sequencing data suggest that WT Trp2/K<sup>b</sup>-specific cells are  
383 deficient in their ability to form the more proliferative subpopulation that comprises a  
384 majority of the *Dct*<sup>-/-</sup> Trp2/K<sup>b</sup>-specific population on day three after priming.

385 Nevertheless, proliferation of the WT population was not entirely constrained, since this  
386 pool continued to expand over successive days (Figure 4).

387

388

389 *WT Trp2/K<sup>b</sup>-specific cells are inefficient at mediating vitiligo*

390

391 T cells that escape self-tolerance mechanisms can sometimes elicit autoimmunity. Even  
392 CD8<sup>+</sup> T cells with very low affinity TCRs that avoid deletional tolerance have been found  
393 to drive tissue destruction following activation (Enouz et al., 2012; Sabatino et al., 2011;  
394 Zehn & Bevan, 2006). Furthermore, vigorous immunization against Trp2 can break  
395 tolerance and lead to vitiligo (Bowne et al., 1999; Cho & Celis, 2009; Moynihan et al.,  
396 2016). Our data indicated that the proliferative response of Trp2/K<sup>b</sup>-specific cells was  
397 only slightly impaired in WT relative to *Dct*<sup>-/-</sup> mice, but the ability of these expanded cells  
398 to mediate overt tissue damage, as indicated by autoimmune vitiligo, was unclear.

399

400 To investigate this, we primed WT and *Dct*<sup>-/-</sup> donors with TriVax, then transferred day  
401 seven effectors to congenically distinct WT recipient mice in parallel and immunized  
402 these recipients with TriVax. Equal numbers of *Dct*<sup>-/-</sup> and WT cells were transferred to  
403 compensate for the reduced response in WT mice. The recipients were treated with  
404 dinitrofluorobenzene (DNFB) on the left flank six days after transfer as a local  
405 inflammatory stimulus (Haas et al., 1992; Mackay et al., 2012; Zhang et al., 2009);  
406 vehicle (acetone/olive oil) was applied to the right flank (Figure 6A). Analysis of the  
407 blood six days after transfer and boosting revealed expansion of both types of donor  
408 cells; although there was a trend for transferred *Dct*<sup>-/-</sup> cells to expand to a greater  
409 degree than donor WT cells, the difference was not statistically significant (Figure 6B).  
410 Recipient mice were subsequently monitored for vitiligo development on a weekly basis  
411 and scored using a numeric metric (Supplemental figure 5A).

412

413

414

415

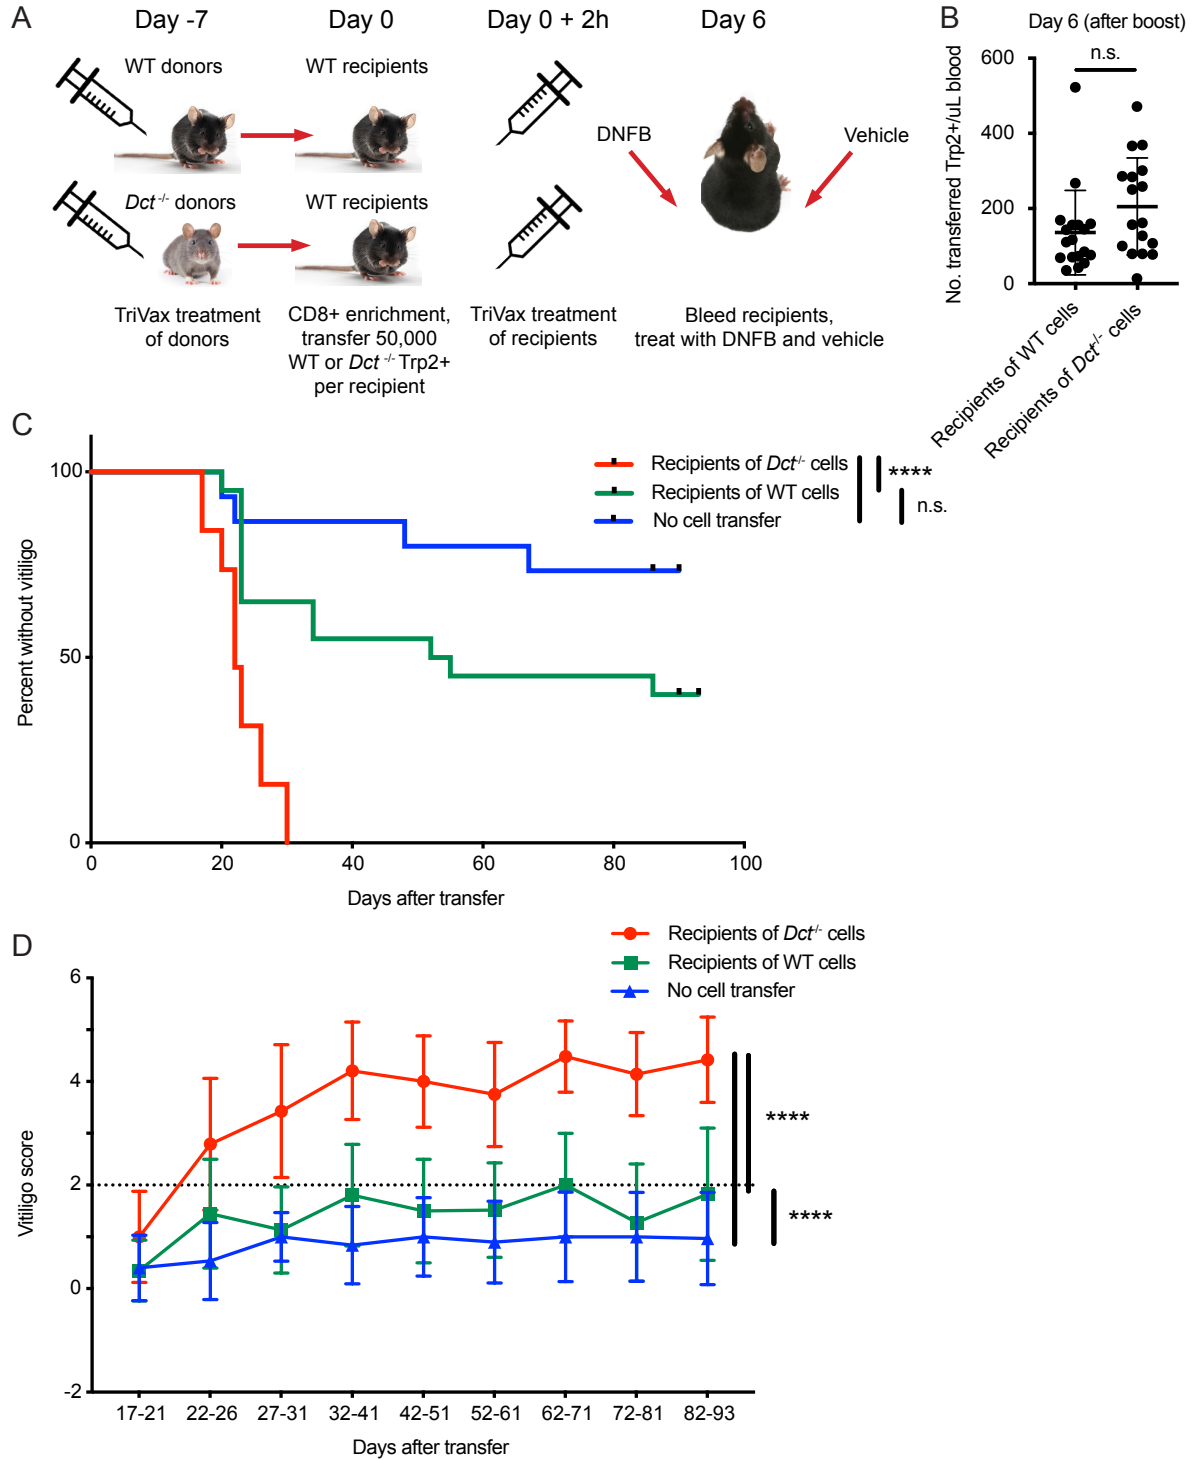



**Figure 6. WT Trp2/K<sup>b</sup>-specific cells are unable to mediate efficient anti-melanocyte activity**

(A) WT mice were monitored for vitiligo after receiving 50,000 Trp2/K<sup>b</sup>-specific cells from WT or *Dct*<sup>-/-</sup> donors primed with TriVax seven days prior; recipient mice received TriVax (100 ug Trp2) on the day of transfer and were treated with DNFB (left flank) six days later. No cell transfer controls (not shown in schematic) received TriVax and DNFB but no transferred cells. (B) Recipient mice were bled on day six after transfer and TriVax; the number of transferred Trp2/K<sup>b</sup>-positive cells per uL blood is shown. (C) Kaplan Meier curve of vitiligo development; mice were considered to have vitiligo when they first had a vitiligo score of two that was sustained. Mean group vitiligo scores over time are shown in (D), with a dotted line indicating definite vitiligo. Data in C and D are compiled from three experiments with 4–10 mice per group. Data in B are compiled from two experiments with 4–10 mice per group. \*\*\*\* p < 0.0001 by unpaired t test (B), log-rank survival analysis (C), or two-way ANOVA followed by Tukey's multiple comparisons test (D).

417 Recipients of *Dct*<sup>-/-</sup> cells developed vitiligo more rapidly and more extensively than mice  
418 receiving WT cells, beginning around day 20 after cell transfer (Figure 6C). Vitiligo was  
419 most frequently initiated at the DNFB-treated site and would often progress over the  
420 following weeks to involve the right flank, hair around the eyes, and—in some cases—  
421 hair distributed over the body. Vitiligo progressed more rapidly and to a greater extent  
422 (higher numeric score) in recipients of *Dct*<sup>-/-</sup> cells (Figure 6D, Supplemental figures 5B  
423 and 5C), although low-grade vitiligo was observed in some mice receiving WT Trp2/K<sup>b</sup>-  
424 specific effector cells or TriVax and DNFB without cell transfer. It is possible that initial  
425 melanocyte destruction mediated by the transferred cells facilitated antigen release and  
426 a broadening of the anti-melanocyte response to include endogenous T cells;  
427 nevertheless, preliminary studies using irrelevant TCR transgenic mice (P14) as  
428 recipients showed that Trp2/K<sup>b</sup>-specific donor cells from *Dct*<sup>-/-</sup> mice were still able to  
429 induce vitiligo in this setting (data not shown).

430  
431 Vitiligo severity (average vitiligo score) was positively correlated with the number of  
432 donor Trp2/K<sup>b</sup>-specific cells in the blood on day 6 after transfer and TriVax boost  
433 (Supplemental figure 5D). This suggests that the enhanced proliferative capacity of *Dct*  
434 <sup>-/-</sup> cells was a factor in their superior ability to induce vitiligo, although it does not rule out  
435 additional qualitative differences between the WT and *Dct*<sup>-/-</sup> populations.

436  
437 In summary, in contrast to the relatively modest differences in the expansion of Trp2/K<sup>b</sup>  
438 responders in WT and *Dct*<sup>-/-</sup> mice, the ability of these populations to mediate  
439 autoimmune damage—melanocyte destruction—was strikingly different.

440  
441  
442

## Discussion

443  
444  
445  
446  
447  
448  
449  
450  
451  
452  
453  
454  
455  
456  
457  
458  
459  
460  
461  
462  
463  
464  
465  
466  
467  
468  
469  
470  
471  
472  
473  
474  
475  
476  
477  
478  
479  
480  
481  
482  
483  
484  
485  
486  
487  
488

A number of groups have demonstrated the existence of self-reactive CD8<sup>+</sup> and CD4<sup>+</sup> T cells in the periphery of mice and healthy human adults (Anderson et al., 2000; Bloom et al., 1997; Delluc et al., 2010; Maeda et al., 2014; Su et al., 2013; Yu et al., 2015). In some cases, self-reactive cells display indicators of reduced functionality, revealing them as tolerant and unlikely to cause spontaneous pathology. For example, self-reactive cells are often reported to express inhibitory receptors such as CTLA-4, PD-1, and LAG-3 (Fife & Bluestone, 2008; Maeda et al., 2014; Nelson et al., 2019; Schietinger et al., 2012). However, studies in human adults have identified self-reactive cells with a phenotype similar to that of naïve CD8<sup>+</sup> T cells specific for foreign antigens (Yu et al., 2015); these cells did not display an overtly anergic phenotype but still responded poorly to stimulation. It is important to understand the mechanisms restraining these cells under normal conditions as well as their potential to cause pathology; such knowledge is critical to designing effective therapies to restrain these cells (e.g., to control autoimmune disease) or induce their responses (e.g., for cancer immunotherapy). As described in this report, we developed a polyclonal mouse model for non-deletional self-tolerance, enabling us to define the characteristics of these cells and their reactivity in a physiological setting.

We found that the pre-immune population of Trp2/K<sup>b</sup>-specific cells in WT and *Dct*<sup>-/-</sup> strains were qualitatively similar, sharing a naïve phenotype and indistinguishable gene expression profile; there were no clear signs of prior antigen exposure among the WT cells. The size of the Trp2/K<sup>b</sup>-specific precursor pool was only slightly (although significantly) smaller in WT mice and the response to Trp2 immunization was substantial in both strains, leading to a > 1000-fold expansion of Trp2/K<sup>b</sup>-specific cells in both WT and *Dct*<sup>-/-</sup> mice. Despite these commonalities, cells primed in *Dct*<sup>-/-</sup> mice proliferated more extensively and were capable of much more rapid and widespread tissue destruction, read out as vitiligo, after adoptive transfer.

Our adoptive transfer studies showed that the observed restraint in the WT Trp2/K<sup>b</sup>-specific response did not depend on extrinsic factors but was a cell-intrinsic feature of pre-immune CD8<sup>+</sup> T cells. This implies that other cell populations, including CD4<sup>+</sup> Tregs or regulatory CD8<sup>+</sup> T cells (Saligrama et al., 2019) are neither required for nor capable of affecting the responses of tolerant and non-tolerant Trp2/K<sup>b</sup>-specific cells during priming. These findings also effectively eliminate the possibility that self-antigen presentation during Trp2 priming alters the nature of the immune response. However, while our studies argue that cell-extrinsic regulation is not required for enforcement or maintenance of tolerance by Trp2/K<sup>b</sup>-specific cells, this does not exclude a potential role for regulatory T cell populations in establishing the initial tolerant state in WT mice. It is currently unclear whether tolerance to Trp2 is enforced during thymic development or in the periphery of WT mice: one report suggested that *Dct* expression is undetectable in thymic mTECs (Träger et al., 2012), but Trp2 could be brought into the thymus by dendritic cell populations to induce tolerance in WT animals. The site of tolerance induction was not a focus of the current study, but it will be interesting to determine whether instances of non-deletional CD8<sup>+</sup> T cell self-tolerance correlate with self-

489 antigen expression patterns in the thymus (e.g., AIRE-regulated tissue-specific antigen  
490 expression).

491  
492 Many of the characteristics we report for Trp2/K<sup>b</sup>-specific CD8<sup>+</sup> T cells in WT mice are  
493 strongly reminiscent of T cells with low affinity/avidity for antigen (Bouneaud et al., 2000;  
494 Enouz et al., 2012; Zehn & Bevan, 2006; Zehn et al., 2009), and we did observe  
495 modestly higher Trp2/K<sup>b</sup> tetramer staining intensity on a subset of *Dct*<sup>-/-</sup> cells compared  
496 to WT responder cells. However, these differences were not progressively magnified as  
497 the immune response developed, arguing against a noticeable outgrowth of higher  
498 affinity/avidity TCR clones in *Dct*<sup>-/-</sup> animals, as might have been expected if TCR affinity  
499 was the primary factor driving improved proliferation in the *Dct*<sup>-/-</sup> population. Indeed, the  
500 relatively subtle differences in Trp2/K<sup>b</sup> tetramer staining that we were able to detect in  
501 this optimized experimental model would not likely be sufficient to predict self-reactivity  
502 versus tolerance in a less controlled setting.

503  
504 Other studies utilizing mouse models have reported that even CD8<sup>+</sup> T cells with very  
505 low affinity/avidity TCRs (including those undetectable by normal peptide/MHC tetramer  
506 staining) can provoke overt tissue damage (Enouz et al., 2012; Sabatino et al., 2011;  
507 Zehn & Bevan, 2006), in some cases at levels comparable to or greater than that  
508 induced by non-tolerant and/or higher affinity cells. Our data indicate that the opposite  
509 can also occur: despite largely overlapping tetramer staining profiles, WT and *Dct*<sup>-/-</sup>  
510 Trp2/K<sup>b</sup>-specific cells exhibit markedly different abilities to mediate widespread vitiligo.  
511 Hence, the impact of CD8<sup>+</sup> T cell tolerance toward some self-antigens only partially  
512 limits expansion but can prevent the generation of cells readily capable of potent tissue  
513 destruction: tolerance is not a binary state.

514  
515 A goal of this work was to define which characteristics, if any, could be associated with  
516 self-tolerant CD8<sup>+</sup> T cells that escape clonal deletion. Unexpectedly, we found that  
517 multiple measures—the enumeration, peptide/MHC tetramer staining intensity,  
518 phenotype, and gene expression of pre-immune cells as well as the ability of these cells  
519 to proliferate following immunogenic exposure to self-antigens—failed to provide a  
520 robust metric for distinguishing CD8<sup>+</sup> T cells that are functionally tolerant (i.e., unlikely to  
521 cause autoimmune pathology) versus non-tolerant (i.e., have a high propensity to  
522 induce autoimmunity). This finding highlights the limitations of currently available assays  
523 for accurately predicting responsiveness to self-antigens.

524  
525 However, we were able to delineate an inflection point following priming at which the  
526 responses of tolerant and non-tolerant cells diverged. Flow cytometry and single-cell  
527 RNA sequencing of Trp2/K<sup>b</sup>-specific CD8<sup>+</sup> T cells soon after priming demonstrated that  
528 WT responders failed to differentiate into a CD25<sup>+</sup>, IRF4<sup>+</sup> population (a characteristic of  
529 most *Dct*<sup>-/-</sup> responder cells) and indicated that WT cells showed poor commitment to  
530 sustained proliferation. These combined features may be useful for further defining the  
531 responses by self-antigen specific cells that are or are not capable of overt tissue  
532 destruction.

533

534 The early effector population of Trp2/K<sup>b</sup>-specific cells demonstrates heterogeneity on a  
535 transcriptomic level in both strains. Whereas the majority of *Dct*<sup>-/-</sup> cells show a highly  
536 proliferative phenotype characterized by active cell cycling and responsiveness to  
537 mTOR and Myc, few WT Trp2/K<sup>b</sup>-specific cells fall into this group. The reason(s)  
538 underlying the inability of WT cells to optimally engage these important pathways and  
539 proliferate efficiently requires further investigation but may relate to impaired sensitivity  
540 to endogenous IL-2 or other cytokines, the composition of the TCR repertoire, and/or  
541 altered TCR signaling. How these or other factors relate to the relative inability of  
542 primed WT Trp2/K<sup>b</sup>-specific cells to mediate overt tissue damage is currently unclear,  
543 but it will be critical to identify the cellular and molecular mechanisms involved in future  
544 studies. Ongoing and future work will address the TCR repertoire and downstream  
545 signaling, metabolic characteristics, and epigenetic landscape of WT versus *Dct*<sup>-/-</sup>  
546 Trp2/K<sup>b</sup>-specific cells. Recent studies on dysfunctional tumor-specific or exhausted  
547 CD8<sup>+</sup> T cells have shown that epigenetic changes in chromatin accessibility or  
548 methylation can maintain such states (Ghoneim et al., 2017; Pauken et al., 2016; Philip  
549 et al., 2017), which could explain the cell-intrinsic nature of the tolerance seen in our  
550 model.

551  
552 We were able to identify CD8<sup>+</sup> T cells specific for other melanocyte epitopes/antigens in  
553 pre-immune mice; these cells had a similar phenotype to WT Trp2/K<sup>b</sup>-specific cells.  
554 Accordingly, we predict that our results will apply to other populations of CD8<sup>+</sup> T cells  
555 specific for melanocyte and potentially other tissue-restricted antigens. Similar  
556 populations of self-specific CD8<sup>+</sup> T cells may exist in humans, and the ability of such  
557 cells to respond to self-antigen immunization while not causing autoimmune damage is  
558 relevant for understanding the limits of “breaking” tolerance, e.g., for cancer  
559 immunotherapy. Indeed, our results align with work examining polyclonal self-antigen-  
560 specific cells in human adults (Yu et al., 2015) with regard to the phenotype (modestly  
561 lower tetramer MFI, lower CD25 expression) and response to cognate peptide  
562 (diminished) observed among tolerant cells. Another study examining self-specific CD8<sup>+</sup>  
563 T cells (Maeda et al., 2014) attributed their restrained responsiveness to Treg-mediated  
564 suppression; while we did not detect a cell-extrinsic regulatory mechanism in our  
565 studies, it is certainly possible that this mechanism limits the response to some self-  
566 antigens.

567  
568 Our finding that polyclonal melanocyte-specific cells exhibit covert cell-intrinsic tolerance  
569 characterized by a partial defect in proliferation and a profound defect in tissue damage  
570 has implications for utilizing such cells therapeutically. This model has clear relevance  
571 to human physiology and will be useful in exploring methods of correcting the  
572 proliferative defects of tolerant cells to more effectively mobilize them in cancer  
573 immunotherapy approaches targeting tumor antigens shared with self.

## 574 **Materials and methods**

575

### 576 *Mice*

577 C57BL/6 (WT) mice were obtained from Charles River laboratories and housed in  
578 specific pathogen-free conditions at the University of Minnesota. *Dct<sup>-/-</sup>* mice on a  
579 C57BL/6 background were developed by A. Andy Hurwitz when at the NCI; the mice  
580 were subsequently bred in-house on different congenic backgrounds and housed in  
581 specific pathogen-free conditions. Animals were used at 6–14 weeks of age. All animal  
582 experiments were approved by the Institutional Animal Care and Use Committee at the  
583 University of Minnesota. In accordance with NIH guidelines, both male and female  
584 animals were used in experiments; males are indicated by square symbols in the  
585 figures.

586

### 587 *Tetramer enrichment*

588 Tetramer enrichment was used to isolate antigen-specific cells from pre-immune or  
589 acutely challenged mice. A modification of the method used by Obar et al. (Obar et al.,  
590 2008) was employed. Following digestion with collagenase D, single-cell suspensions  
591 were prepared from the spleens (acutely challenged mice) or spleen and  
592 peripheral/mesenteric lymph nodes (pre-immune mice). When possible, the same  
593 tetramer (Trp<sub>2180–188</sub>/K<sup>b</sup>) was used in both APC and PE to ensure specificity. Anti-PE  
594 and anti-APC beads and magnetized columns (both from Miltenyi Biotec) were used to  
595 enrich for tetramer-bound cells. Samples were stained and analyzed by flow cytometry;  
596 CountBright counting beads (Invitrogen) were used for enumeration.

597

### 598 *In vivo priming with Trp2*

599 TriVax immunization was used as previously described (Cho & Celis, 2009); mice were  
600 immunized intravenously (via tail vein injections) with Trp<sub>2180–188</sub> peptide or Trp2 and  
601 B8R<sub>20–27</sub> peptides, agonist-anti CD40 antibody (BioXCell), and vaccine-grade poly(I:C),  
602 a toll-like receptor 3 agonist (InvivoGen). Peptide doses of 50, 100, and 200 µg were  
603 used for effector timepoints, transfer experiments, and acute timepoints, respectively.  
604 Animals that received TriVax immunization via intraperitoneal instead of intravenous  
605 injection were removed from the analysis.

606

### 607 *Infections with LmTrp2*

608 Frozen stocks of LmTrp2 (Bruhn et al., 2005) were thawed and grown to log-phase in  
609 tryptic soy broth supplemented with streptomycin (50 µg/mL). Mice were typically  
610 injected with approximately 10<sup>5</sup>–10<sup>6</sup> colony-forming units intravenously or  
611 intraperitoneally. Infectious doses were verified by colony counts on tryptic soy broth-  
612 streptomycin plates.

613

### 614 *Ex vivo stimulation*

615 In some experiments, splenocytes were stimulated ex vivo after isolation from infected  
616 mice. Splenocytes were incubated with Trp2 peptide (10<sup>-6</sup> M) and Golgiplug (BD  
617 Biosciences) for 4–6 hours at 37°C; parallel wells with no peptide were used as a  
618 control. Cells were washed and stained with surface antibodies, followed by fixation and

619 permeabilization with a FoxP3 Fix/Perm kit (eBioscience) or FoxP3/transcription factor  
620 staining buffer kit (Tonbo Biosciences) and staining with intracellular antibodies.

621

622

### 623 *Adoptive transfer experiments*

624 Bulk polyclonal CD8<sup>+</sup> T cells were isolated from the spleen and lymph nodes of WT or  
625 *Dct*<sup>-/-</sup> mice using negative magnetic enrichment (CD8a<sup>+</sup> T cell Isolation Kit; Miltenyi  
626 Biotec). Enriched CD8<sup>+</sup> T cells (typically ~75-90% pure) were resuspended in sterile  
627 PBS and 2–2.5 x 10<sup>6</sup> CD8<sup>+</sup> T cells were injected intravenously per recipient mouse;  
628 recipient mice were congenically distinct. One day later, the recipient mice were  
629 immunized with TriVax or LmTrp2 intravenously or intraperitoneally. Mice were  
630 sacrificed for analysis seven days later.

631

### 632 *Bulk RNA sequencing of pre-immune mice*

633 Trp2/K<sup>b</sup>-specific cells were isolated from pre-immune WT and *Dct*<sup>-/-</sup> mice using tetramer  
634 enrichment followed by fluorescence-activated cell sorting on double tetramer positive  
635 cells. Cells were isolated from three separate cohorts, with each cohort comprising eight  
636 WT and eight *Dct*<sup>-/-</sup> mice. The Clontech StrandedRNA Pico Mammalian workflow was  
637 used for library preparation, and samples were sequenced using an Illumina NextSeq  
638 instrument (2x75 bp paired end reads).

639

### 640 *Bulk RNAseq analysis*

641 Raw sequencing data were demultiplexed by sample into FASTQs (mean 24.6 million  
642 reads/sample) and mapped against the mouse genome (Ensembl GRCm38 release 95)  
643 using Hisat2 software (v 2.1.0). Gene level quantification was completed using Subread  
644 featureCounts software (v 1.6.2) and the read counts table was processed in R (v  
645 3.5.2). Differentially expressed genes were identified with DESeq2 software (v 1.22.2)  
646 using a negative binomial model with effect size estimation completed by apegglm  
647 algorithm via the lfcShrink function. Group comparison p-values were adjusted by the  
648 Benjamini and Hochberg method to account for multiple hypothesis testing where genes  
649 with a false discovery rate (FDR)  $q < 0.05$  were investigated in downstream analyses.

650

### 651 *Single-cell RNA sequencing*

652 WT and *Dct*<sup>-/-</sup> mice were primed with TriVax (200  $\mu$ g Trp2), and Trp2/K<sup>b</sup>-specific cells  
653 were isolated on day three using tetramer enrichment followed by fluorescence-  
654 activated cell sorting. Cells were submitted for barcoding and library preparation using  
655 the 10x Genomics platform (Chromium Single Cell 5' Library & Gel Bead Kit) (Zheng et  
656 al., 2017) and each sample was sequenced using an Illumina NovaSeq instrument with  
657 2x150 bp paired end protocol.

658

### 659 *Single-cell RNAseq analysis*

660 Raw sequencing data were processed using Cell Ranger (v 3.0.2; 10x Genomics)  
661 software programs “mkfastq” for demultiplexing the WT and *Dct*<sup>-/-</sup> Illumina libraries and  
662 “count” for read alignment against the mouse genome (mm10, provided by 10x  
663 Genomics, ver 3.0.0) and generation of the mRNA transcript count table. Raw count  
664 data were loaded into R (v 3.6.1) and analyzed with the Seurat R package (v

665 3.0.3.9039) (Butler et al., 2018; Stuart et al., 2019). Each scRNA dataset (WT or *Dct*<sup>-/-</sup>)  
666 was independently filtered to include only cells (i.e. uniquely barcoded transcripts)  
667 expressing more than 300 genes and genes expressed in more than 3 cells (e.g. counts  
668 > 0). The proportion of mitochondrial RNA in each cell was calculated and cells with  
669 extreme levels (top or bottom 2% of all cells) were removed from the analysis. Genes  
670 with extreme expression levels (top or bottom 1% of all genes) were removed.  
671 Contaminating cells expressing high levels of B cell or myeloid lineage marker genes  
672 and low levels of T cell markers were removed using empirically derived thresholds (675  
673 B cells and 26 myeloid cells removed from WT and 117 B cells removed from *Dct*<sup>-/-</sup>). A  
674 total of 4,539 WT cells (19,326 genes) and 11,680 *Dct*<sup>-/-</sup> cells (19,416 genes) were  
675 analyzed downstream. Raw RNA counts were normalized with the LogNormalize  
676 function and each cell was classified according to its expression of canonical cell cycle  
677 genes using the CellCycleScoring function (gene sets provided in Seurat). Raw RNA  
678 counts were normalized and transformed using the Seurat SCTransform function  
679 (Hafemeister & Satija, 2019) including the percent of mitochondria expression and cell  
680 cycle S/G2M-phase scores as regression factors. Principal components analysis (PCA)  
681 was performed using the normalized, mean-centered, and scaled SCT dataset  
682 (RunPCA function). The top 3000 variable genes from each dataset were identified  
683 using the FindVariableFeatures function (vst method) and were used for WT and *Dct*<sup>-/-</sup>  
684 sample integration (Stuart et al., 2019). Two-dimensional projections were generated  
685 using the top 30 PCA vectors as input to the RunTSNE and RunUMAP functions. Cells  
686 were clustered using the FindNeighbors (top 30 PCA vectors) and FindClusters  
687 functions (testing a range of possible resolutions: 0.2, 0.4, 0.8, 1.2, 1.6). Pairwise  
688 differential gene expression (DE) testing (Wilcox rank-sum) with the FindMarkers  
689 function was performed between all initial clusters; any two clusters were merged if  
690 there were fewer than 5 significant DE genes (i.e. absolute value of log<sub>2</sub>-fold-change >=  
691 0.25 and Bonferroni adjusted p-value <= 0.01). Pairwise DE testing continued on  
692 subsequently merged clusters. A final resolution of 0.2 was chosen (merging of initial  
693 clusters by DE testing was not required) to best represent the biological processes  
694 within the dataset. Cluster-specific pathway expression testing was completed using the  
695 VISION R package (DeTomaso et al., 2019) and figures were generated using the  
696 ggplot2 R package (Wickham, 2016). Gene Set Enrichment Analysis (Mootha et al.,  
697 2003; Subramanian et al., 2005) was performed using pre-ranked gene lists (sorted  
698 from largest to smallest log<sub>2</sub> fold change between clusters compared). Gene set  
699 enrichment statistics were calculated for two gene set collections in the Molecular  
700 Signatures Database (hallmarks and c2 curated) derived for mouse symbols using the  
701 R package msigdb, v 6.2.1 using the R package clusterProfiler (v 3.12.0). Interesting  
702 gene sets with a FDR q < 0.05 were evaluated. Raw and processed data have been  
703 deposited at Gene Expression Omnibus and are available via GEO.

704

#### 705 *IL2 complex treatment*

706 10 µg antibody (S4B6-1; Bio XCell) plus 1 µg murine recombinant carrier-free murine IL-  
707 2 (R&D) was administered per mouse via intraperitoneal injection on day 5 after priming  
708 with TriVax or LmTrp2; control mice received an equal volume of PBS.

709

710

### 711 *Vitiligo induction*

712 Donor mice (WT and *Dct*<sup>-/-</sup>) were primed with TriVax (100 µg Trp2); in one experiment,  
713 donor mice received ~50% less of the other TriVax components to minimize adverse  
714 reactions. Negative enrichment for CD8+ T cells was performed on day seven. Live  
715 cells were counted using a hemocytometer, and the percentages of CD8+ and Trp2/K<sup>b</sup>  
716 tetramer-binding cells were applied to enumerate Trp2/K<sup>b</sup>-specific cells; equal numbers  
717 (50,000) of WT or *Dct*<sup>-/-</sup> Trp2/K<sup>b</sup>-specific cells were transferred to WT recipients.  
718 Recipients were treated with TriVax (100 µg Trp2) later the same day. On day six after  
719 cell transfer, the recipients were bled to assess donor populations. The mice were then  
720 treated with dinitrofluorobenzene (DNFB; 0.15% in 4:1 acetone:olive oil) on the left  
721 flank; 30 µL was applied to a shaved patch of skin ~ 1.5 x 1.5 cm in size. 30 µL of  
722 vehicle was applied to the right flank in the same manner. Control mice did not receive  
723 cell transfers, but did receive TriVax immunization and DNFB treatment at the same  
724 time as mice receiving cell transfers. Mice were monitored for vitiligo development on a  
725 weekly basis by an observer blinded to the experimental groups.

### 726 *Tetramers and flow cytometry*

728 H-2K<sup>b</sup> tetramers loaded with Trp2<sub>180-188</sub> or B8R<sub>20-27</sub> were obtained from the NIH tetramer  
729 core facility and labelled with streptavidin-fluorophore conjugates in house. Single-cell  
730 suspensions were stained with tetramers (when applicable) and fluorescent dye-  
731 conjugated antibodies purchased from BD Biosciences, Tonbo Biosciences,  
732 eBioscience, or BioLegend. In many experiments, Live/Dead Fixable Aqua Dead Cell  
733 Stain Kit (ThermoFisher Scientific) was used for dead cell exclusion. When applicable,  
734 cells were fixed with a FoxP3 Fix/Perm kit (eBioscience) or FoxP3/transcription factor  
735 staining buffer kit (Tonbo Biosciences). These kits were also used for permeabilization  
736 prior to staining with intracellular antibodies. Samples were run on a BD LSR II or BD  
737 Fortessa instrument using BD FACSDiva (BD Bioscience), and data were analyzed with  
738 FlowJo (BD).

### 739 *Statistical analysis*

741 Prism software (GraphPad) was used to plot data and conduct statistical analyses. An  
742 unpaired t test was used for two-way comparisons between two groups. A one-way  
743 ANOVA with Sidak's or Tukey's multiple comparisons test was used when multiple  
744 comparisons were performed. Log-rank (Mantel-Cox) tests were used to evaluate  
745 Kaplan-Meier curves. A two-way ANOVA with Tukey's multiple comparisons test was  
746 used to evaluate vitiligo scores over time. P-values are represented as follows: \* p <  
747 0.05, \*\* p < 0.01, \*\*\* p < 0.001, \*\*\*\* p < 0.0001.

748  
749

### 750 **Supplemental material**

751  
752 Fig. S1 shows additional analysis of the Trp2/K<sup>b</sup>-specific population and cells specific  
753 for other melanocyte epitopes in pre-immune mice. Fig. S2 presents data using LmTrp2  
754 as an alternative method of stimulating with Trp2. Fig. S3 shows overlays of tetramer  
755 staining at various time points after TriVax immunization, along with the acute response  
756 to in vivo stimulation with Trp2 peptide alone. Gene set enrichment analysis of single-



757 cell data and the response of WT and KO Trp2/K<sup>b</sup>-specific cells to IL-2C are presented  
758 in Fig. S4. Fig. S5 shows the vitiligo scoring metric and correlation analysis of the  
759 average vitiligo score relative to the number of transferred Trp2/K<sup>b</sup>-specific cells  
760 following transfer and boosting.

761

762

### 763 **Author contributions**

764

765 ENT, KRR, and SCJ designed experiments and interpreted results. ENT, KSB, HBdS,  
766 KEB, and KRR performed experiments, and ENT analyzed results. TPK performed  
767 bioinformatics analysis of RNAseq data and wrote the relevant portions of the Methods  
768 section. AAH and KRS created the *Dct*-deficient mouse strain. RBF performed initial  
769 experiments leading to these studies and provided guidance. ENT and SCJ wrote the  
770 manuscript, with all authors contributing to edits.

771

772

773

### 774 **Acknowledgments**

775

776 We thank members of the Jamequist lab for helpful discussions and technical  
777 assistance. We thank the UMN Flow Cytometry Resource for cell sorting, the UMN  
778 Genomics Center for assistance with sequencing experiments, and the NIH tetramer  
779 core for peptide/MHC monomers. We thank the Celis and Restifo labs for providing  
780 reagents and samples used in enumerating cells specific for alternative melanocyte  
781 epitopes. We thank Dietmar Zehn for reviewing an early draft of this manuscript.

782

783 This work was supported by NIH grants P01 AI035296 (SCJ), R01 AI140631 (SCJ), and  
784 T32 OD010993 (ENT).

785

786

### 787 **Competing interests**

788 The authors declare no competing financial interests.

789

790

791

## References

- 792  
793  
794 Anderson, A. C., Nicholson, L. B., Legge, K. L., Turchin, V., Zaghouani, H., & Kuchroo, V. K.  
795 (2000). High frequency of autoreactive myelin proteolipid protein-specific T cells in the  
796 periphery of naive mice: mechanisms of selection of the self-reactive repertoire. *J Exp*  
797 *Med*, 191(5), 761-770.
- 798 Avogadri, F., Gnjatic, S., Tassello, J., Frosina, D., Hanson, N., Laudenbach, M., . . . Jungbluth,  
799 A. A. (2016). Protein Expression Analysis of Melanocyte Differentiation Antigen TRP-2.  
800 *Am J Dermatopathol*, 38(3), 201-207. doi:10.1097/DAD.0000000000000362
- 801 Azzam, H. S., Grinberg, A., Lui, K., Shen, H., Shores, E. W., & Love, P. E. (1998). CD5  
802 expression is developmentally regulated by T cell receptor (TCR) signals and TCR  
803 avidity. *J Exp Med*, 188(12), 2301-2311. doi:10.1084/jem.188.12.2301
- 804 Bloom, M. B., PerryLalley, D., Robbins, P. F., Li, Y., ElGamil, M., Rosenberg, S. A., & Yang, J.  
805 C. (1997). Identification of tyrosinase-related protein 2 as a tumor rejection antigen for  
806 the B16 melanoma. *Journal of Experimental Medicine*, 185(3), 453-459.  
807 doi:10.1084/jem.185.3.453
- 808 Bouneaud, C., Kourilsky, P., & Bousso, P. (2000). Impact of negative selection on the T cell  
809 repertoire reactive to a self-peptide: A large fraction of T cell clones escapes clonal  
810 deletion. *Immunity*, 13(6), 829-840. doi:10.1016/s1074-7613(00)00080-7
- 811 Bowne, W. B., Srinivasan, R., Wolchok, J. D., Hawkins, W. G., Blachere, N. E., Dylla, R., . . .  
812 Houghton, A. N. (1999). Coupling and uncoupling of tumor immunity and autoimmunity.  
813 *J Exp Med*, 190(11), 1717-1722.
- 814 Bruhn, K. W., Craft, N., Nguyen, B. D., Yip, J., & Miller, J. F. (2005). Characterization of anti-self  
815 CD8 T-cell responses stimulated by recombinant *Listeria monocytogenes* expressing the  
816 melanoma antigen TRP-2. *Vaccine*, 23(33), 4263-4272.  
817 doi:10.1016/j.vaccine.2005.02.018
- 818 Butler, A., Hoffman, P., Smibert, P., Papalexi, E., & Satija, R. (2018). Integrating single-cell  
819 transcriptomic data across different conditions, technologies, and species. *Nat*  
820 *Biotechnol*, 36(5), 411-420. doi:10.1038/nbt.4096
- 821 Byrne, K. T., Côté, A. L., Zhang, P., Steinberg, S. M., Guo, Y., Allie, R., . . . Turk, M. J. (2011).  
822 Autoimmune melanocyte destruction is required for robust CD8+ memory T cell  
823 responses to mouse melanoma. *J Clin Invest*, 121(5), 1797-1809. doi:10.1172/JCI44849
- 824 Cai, Z., Kishimoto, H., Brunmark, A., Jackson, M. R., Peterson, P. A., & Sprent, J. (1997).  
825 Requirements for peptide-induced T cell receptor downregulation on naive CD8+ T cells.  
826 *J Exp Med*, 185(4), 641-651.
- 827 Cheng, M., & Anderson, M. S. (2018). Thymic tolerance as a key brake on autoimmunity. *Nat*  
828 *Immunol*, 19(7), 659-664. doi:10.1038/s41590-018-0128-9
- 829 Cho, H. I., & Celis, E. (2009). Optimized Peptide Vaccines Eliciting Extensive CD8 T-Cell  
830 Responses with Therapeutic Antitumor Effects. *Cancer Research*, 69(23), 9012-9019.  
831 doi:10.1158/0008-5472.can-09-2019

- 832 Daniels, M. A., & Jameson, S. C. (2000). Critical role for CD8 in T cell receptor binding and  
833 activation by peptide/major histocompatibility complex multimers. *J Exp Med*, *191*(2),  
834 335-346. doi:10.1084/jem.191.2.335
- 835 Daniels, M. A., Teixeira, E., Gill, J., Hausmann, B., Roubaty, D., Holmberg, K., . . . Palmer, E.  
836 (2006). Thymic selection threshold defined by compartmentalization of Ras/MAPK  
837 signalling. *Nature*, *444*(7120), 724-729. doi:10.1038/nature05269
- 838 Delluc, S., Ravot, G., & Maillere, B. (2010). Quantification of the preexisting CD4 T-cell  
839 repertoire specific for human erythropoietin reveals its immunogenicity potential. *Blood*,  
840 *116*(22), 4542-4545. doi:10.1182/blood-2010-04-280875
- 841 DeTomaso, D., Jones, M. G., Subramaniam, M., Ashuach, T., Ye, C. J., & Yosef, N. (2019).  
842 Functional interpretation of single cell similarity maps. *Nat Commun*, *10*(1), 4376.  
843 doi:10.1038/s41467-019-12235-0
- 844 Enouz, S., Carrié, L., Merkler, D., Bevan, M. J., & Zehn, D. (2012). Autoreactive T cells bypass  
845 negative selection and respond to self-antigen stimulation during infection. *J Exp Med*,  
846 *209*(10), 1769-1779. doi:10.1084/jem.20120905
- 847 Fife, B. T., & Bluestone, J. A. (2008). Control of peripheral T-cell tolerance and autoimmunity via  
848 the CTLA-4 and PD-1 pathways. *Immunol Rev*, *224*, 166-182. doi:10.1111/j.1600-  
849 065X.2008.00662.x
- 850 Fulton, R. B., Hamilton, S. E., Xing, Y., Best, J. A., Goldrath, A. W., Hogquist, K. A., & Jameson,  
851 S. C. (2015). The TCR's sensitivity to self peptide-MHC dictates the ability of naive  
852 CD8(+) T cells to respond to foreign antigens. *Nature Immunology*, *16*(1), 107-+.  
853 doi:10.1038/ni.3043
- 854 Ghoneim, H. E., Fan, Y., Moustaki, A., Abdelsamed, H. A., Dash, P., Dogra, P., . . .  
855 Youngblood, B. (2017). De Novo Epigenetic Programs Inhibit PD-1 Blockade-Mediated T  
856 Cell Rejuvenation. *Cell*, *170*(1), 142-157.e119. doi:10.1016/j.cell.2017.06.007
- 857 Guyonneau, L., Murisier, F., Rossier, A., Moulin, A., & Beermann, F. (2004). Melanocytes and  
858 pigmentation are affected in dopachrome tautomerase knockout mice. *Mol Cell Biol*,  
859 *24*(8), 3396-3403. doi:10.1128/mcb.24.8.3396-3403.2004
- 860 Haas, J., Lipkow, T., Mohamadzadeh, M., Kolde, G., & Knop, J. (1992). Induction of  
861 inflammatory cytokines in murine keratinocytes upon in vivo stimulation with contact  
862 sensitizers and tolerizing analogues. *Exp Dermatol*, *1*(2), 76-83. doi:10.1111/j.1600-  
863 0625.1992.tb00075.x
- 864 Hafemeister, C., & Satija, R. (2019). Normalization and variance stabilization of single-cell RNA-  
865 seq data using regularized negative binomial regression. *Genome Biol*, *20*(1), 296.  
866 doi:10.1186/s13059-019-1874-1
- 867 Hogquist, K. A., Baldwin, T. A., & Jameson, S. C. (2005). Central tolerance: Learning self-  
868 control in the thymus. *Nature Reviews Immunology*, *5*(10), 772-782. doi:10.1038/nri1707

- 869 Ji, Q., Gondek, D., & Hurwitz, A. A. (2005). Provision of granulocyte-macrophage colony-  
870 stimulating factor converts an autoimmune response to a self-antigen into an antitumor  
871 response. *J Immunol*, 175(3), 1456-1463. doi:10.4049/jimmunol.175.3.1456
- 872 Kappler, J. W., Roehm, N., & Marrack, P. (1987). T cell tolerance by clonal elimination in the  
873 thymus. *Cell*, 49(2), 273-280. doi:10.1016/0092-8674(87)90568-x
- 874 Liu, H. P., Moynihan, K. D., Zheng, Y. R., Szeto, G. L., Li, A. V., Huang, B., . . . Irvine, D. J.  
875 (2014). Structure-based programming of lymph-node targeting in molecular vaccines.  
876 *Nature*, 507(7493), 519-+. doi:10.1038/nature12978
- 877 Mackay, L. K., Stock, A. T., Ma, J. Z., Jones, C. M., Kent, S. J., Mueller, S. N., . . . Gebhardt, T.  
878 (2012). Long-lived epithelial immunity by tissue-resident memory T (TRM) cells in the  
879 absence of persisting local antigen presentation. *Proc Natl Acad Sci U S A*, 109(18),  
880 7037-7042. doi:10.1073/pnas.1202288109
- 881 Maeda, Y., Nishikawa, H., Sugiyama, D., Ha, D., Hamaguchi, M., Saito, T., . . . Sakaguchi, S.  
882 (2014). Detection of self-reactive CD8(+) T cells with an anergic phenotype in healthy  
883 individuals. *Science*, 346(6216), 1536-1540. doi:10.1126/science.aaa1292
- 884 McWilliams, J. A., McGurran, S. M., Dow, S. W., Slansky, J. E., & Kiedl, R. M. (2006). A  
885 modified tyrosinase-related protein 2 epitope generates high-affinity tumor-specific T  
886 cells but does not mediate therapeutic efficacy in an intradermal tumor model. *J*  
887 *Immunol*, 177(1), 155-161. doi:10.4049/jimmunol.177.1.155
- 888 Mei, Q., Huang, J., Chen, W., Tang, J., Xu, C., Yu, Q., . . . Li, S. (2017). Regulation of DNA  
889 replication-coupled histone gene expression. *Oncotarget*, 8(55), 95005-95022.  
890 doi:10.18632/oncotarget.21887
- 891 Mescher, M. F., Agarwal, P., Casey, K. A., Hammerbeck, C. D., Xiao, Z. G., & Curtsinger, J. M.  
892 (2007). Molecular basis for checkpoints in the CD8 T cell response: Tolerance versus  
893 activation. *Seminars in Immunology*, 19(3), 153-161. doi:10.1016/j.smim.2007.02.007
- 894 Mootha, V. K., Lindgren, C. M., Eriksson, K. F., Subramanian, A., Sihag, S., Lehar, J., . . .  
895 Groop, L. C. (2003). PGC-1alpha-responsive genes involved in oxidative  
896 phosphorylation are coordinately downregulated in human diabetes. *Nat Genet*, 34(3),  
897 267-273. doi:10.1038/ng1180
- 898 Moynihan, K. D., Opel, C. F., Szeto, G. L., Tzeng, A., Zhu, E. F., Engreitz, J. M., . . . Irvine, D. J.  
899 (2016). Eradication of large established tumors in mice by combination immunotherapy  
900 that engages innate and adaptive immune responses. *Nat Med*, 22(12), 1402-1410.  
901 doi:10.1038/nm.4200
- 902 Mueller, D. L. (2010). Mechanisms maintaining peripheral tolerance. *Nature Immunology*, 11(1),  
903 21-27. doi:10.1038/ni.1817
- 904 Nelson, C. E., Mills, L. J., McCurtain, J. L., Thompson, E. A., Seelig, D. M., Bhela, S., . . .  
905 Vezys, V. (2019). Reprogramming responsiveness to checkpoint blockade in  
906 dysfunctional CD8 T cells. *Proc Natl Acad Sci U S A*. doi:10.1073/pnas.1810326116

- 907 Obar, J. J., Khanna, K. M., & Lefrançois, L. (2008). Endogenous naive CD8+ T cell precursor  
908 frequency regulates primary and memory responses to infection. *Immunity*, 28(6), 859-  
909 869. doi:10.1016/j.immuni.2008.04.010
- 910 Obar, J. J., Molloy, M. J., Jellison, E. R., Stoklasek, T. A., Zhang, W., Usherwood, E. J., &  
911 Lefrançois, L. (2010). CD4+ T cell regulation of CD25 expression controls development  
912 of short-lived effector CD8+ T cells in primary and secondary responses. *Proc Natl Acad  
913 Sci U S A*, 107(1), 193-198. doi:10.1073/pnas.0909945107
- 914 Ozga, A. J., Moalli, F., Abe, J., Swoger, J., Sharpe, J., Zehn, D., . . . Stein, J. V. (2016). pMHC  
915 affinity controls duration of CD8+ T cell-DC interactions and imprints timing of effector  
916 differentiation versus expansion. *J Exp Med*, 213(12), 2811-2829.  
917 doi:10.1084/jem.20160206
- 918 Palmer, E. (2003). Negative selection - Clearing out the bad apples from the T-cell repertoire.  
919 *Nature Reviews Immunology*, 3(5), 383-391. doi:10.1038/nri1085
- 920 Parkhurst, M. R., Fitzgerald, E. B., Southwood, S., Sette, A., Rosenberg, S. A., & Kawakami, Y.  
921 (1998). Identification of a shared HLA-A\*0201 restricted T-cell epitope from the  
922 melanoma antigen tyrosinase-related protein 2 (TRP2). *Cancer Research*, 58(21), 4895-  
923 4901.
- 924 Pauken, K. E., Sammons, M. A., Odorizzi, P. M., Manne, S., Godec, J., Khan, O., . . . Wherry,  
925 E. J. (2016). Epigenetic stability of exhausted T cells limits durability of reinvigoration by  
926 PD-1 blockade. *Science*, 354(6316), 1160-1165. doi:10.1126/science.aaf2807
- 927 Philip, M., Fairchild, L., Sun, L., Horste, E. L., Camara, S., Shakiba, M., . . . Schietinger, A.  
928 (2017). Chromatin states define tumour-specific T cell dysfunction and reprogramming.  
929 *Nature*, 545, 452-456. doi:doi:10.1038/nature22367
- 930 Preston, G. C., Sinclair, L. V., Kaskar, A., Hukelmann, J. L., Navarro, M. N., Ferrero, I., . . .  
931 Cantrell, D. A. (2015). Single cell tuning of Myc expression by antigen receptor signal  
932 strength and interleukin-2 in T lymphocytes. *EMBO J*, 34(15), 2008-2024.  
933 doi:10.15252/embj.201490252
- 934 Redmond, W. L., & Sherman, L. A. (2005). Peripheral tolerance of CD8 T lymphocytes.  
935 *Immunity*, 22(3), 275-284. doi:10.1016/j.immuni.2005.01.010
- 936 Richards, D. M., Kyewski, B., & Feuerer, M. (2016). Re-examining the Nature and Function of  
937 Self-Reactive T cells. *Trends in Immunology*, 37(2), 114-125.  
938 doi:10.1016/j.it.2015.12.005
- 939 Richards, D. M., Ruggiero, E., Hofer, A. C., Sefrin, J. P., Schmidt, M., von Kalle, C., & Feuerer,  
940 M. (2015). The Contained Self-Reactive Peripheral T Cell Repertoire: Size, Diversity,  
941 and Cellular Composition. *Journal of Immunology*, 195(5), 2067-2079.  
942 doi:10.4049/jimmunol.1500880
- 943 Rosenberg, S. A. (2014). IL-2: the first effective immunotherapy for human cancer. *J Immunol*,  
944 192(12), 5451-5458. doi:10.4049/jimmunol.1490019

- 945 Sabatino, J. J., Huang, J., Zhu, C., & Evavold, B. D. (2011). High prevalence of low affinity  
946 peptide-MHC II tetramer-negative effectors during polyclonal CD4+ T cell responses. *J*  
947 *Exp Med*, 208(1), 81-90. doi:10.1084/jem.20101574
- 948 Saligrama, N., Zhao, F., Sikora, M. J., Serratelli, W. S., Fernandes, R. A., Louis, D. M., . . .  
949 Davis, M. M. (2019). Opposing T cell responses in experimental autoimmune  
950 encephalomyelitis. *Nature*, 572(7770), 481-487. doi:10.1038/s41586-019-1467-x
- 951 Schietinger, A., Delrow, J. J., Basom, R. S., Blattman, J. N., & Greenberg, P. D. (2012).  
952 Rescued Tolerant CD8 T Cells Are Preprogrammed to Reestablish the Tolerant State.  
953 *Science*, 335(6069), 723-727. doi:10.1126/science.1214277
- 954 Schietinger, A., & Greenberg, P. D. (2014). Tolerance and exhaustion: defining mechanisms of  
955 T cell dysfunction. *Trends in Immunology*, 35(2), 51-60. doi:10.1016/j.it.2013.10.001
- 956 Shioh, L. R., Rosen, D. B., Brdicková, N., Xu, Y., An, J., Lanier, L. L., . . . Matloubian, M.  
957 (2006). CD69 acts downstream of interferon-alpha/beta to inhibit S1P1 and lymphocyte  
958 egress from lymphoid organs. *Nature*, 440(7083), 540-544. doi:10.1038/nature04606
- 959 Steitz, J., Brück, J., Lenz, J., Büchs, S., & Tüting, T. (2005). Peripheral CD8+ T cell tolerance  
960 against melanocytic self-antigens in the skin is regulated in two steps by CD4+ T cells  
961 and local inflammation: implications for the pathophysiology of vitiligo. *J Invest Dermatol*,  
962 124(1), 144-150. doi:10.1111/j.0022-202X.2004.23538.x
- 963 Stuart, T., Butler, A., Hoffman, P., Hafemeister, C., Papalexi, E., Mauck, W. M., . . . Satija, R.  
964 (2019). Comprehensive Integration of Single-Cell Data. *Cell*, 177(7), 1888-1902.e1821.  
965 doi:10.1016/j.cell.2019.05.031
- 966 Su, L. F., Kidd, B. A., Han, A., Kotzin, J. J., & Davis, M. M. (2013). Virus-specific CD4(+)  
967 memory-phenotype T cells are abundant in unexposed adults. *Immunity*, 38(2), 373-383.  
968 doi:10.1016/j.immuni.2012.10.021
- 969 Subramanian, A., Tamayo, P., Mootha, V. K., Mukherjee, S., Ebert, B. L., Gillette, M. A., . . .  
970 Mesirov, J. P. (2005). Gene set enrichment analysis: a knowledge-based approach for  
971 interpreting genome-wide expression profiles. *Proc Natl Acad Sci U S A*, 102(43),  
972 15545-15550. doi:10.1073/pnas.0506580102
- 973 Träger, U., Sierro, S., Djordjevic, G., Bouzo, B., Khandwala, S., Meloni, A., . . . Simon, A. K.  
974 (2012). The immune response to melanoma is limited by thymic selection of self-  
975 antigens. *PLoS One*, 7(4), e35005. doi:10.1371/journal.pone.0035005
- 976 Valenzuela, J., Schmidt, C., & Mescher, M. (2002). The roles of IL-12 in providing a third signal  
977 for clonal expansion of naive CD8 T cells. *J Immunol*, 169(12), 6842-6849.
- 978 Waithman, J., Gebhardt, T., Davey, G. M., Heath, W. R., & Carbone, F. R. (2008). Cutting edge:  
979 Enhanced IL-2 signaling can convert self-specific T cell response from tolerance to  
980 autoimmunity. *J Immunol*, 180(9), 5789-5793. doi:10.4049/jimmunol.180.9.5789
- 981 Wang, R. F., Appella, E., Kawakami, Y., Kang, X., & Rosenberg, S. A. (1996). Identification of  
982 TRP-2 as a human tumor antigen recognized by cytotoxic T lymphocytes. *J Exp Med*,  
983 184(6), 2207-2216. doi:10.1084/jem.184.6.2207

- 984 Weninger, W., Crowley, M. A., Manjunath, N., & von Andrian, U. H. (2001). Migratory properties  
985 of naive, effector, and memory CD8(+) T cells. *J Exp Med*, *194*(7), 953-966.
- 986 Wickham, H. (2016). *ggplot2: Elegant Graphics for Data Analysis*. New York: Springer-Verlag.
- 987 Yu, W., Jiang, N., Ebert, P. J. R., Kidd, B. A., Muller, S., Lund, P. J., . . . Davis, M. M. (2015).  
988 Clonal Deletion Prunes but Does Not Eliminate Self-Specific alpha beta CD8(+) T  
989 Lymphocytes. *Immunity*, *42*(5), 929-941. doi:10.1016/j.immuni.2015.05.001
- 990 Zehn, D., & Bevan, M. J. (2006). T cells with low avidity for a tissue-restricted antigen routinely  
991 evade central and peripheral tolerance and cause autoimmunity. *Immunity*, *25*(2), 261-  
992 270. doi:10.1016/j.immuni.2006.06.009
- 993 Zehn, D., Lee, S. Y., & Bevan, M. J. (2009). Complete but curtailed T-cell response to very low-  
994 affinity antigen. *Nature*, *458*(7235), 211-214. doi:10.1038/nature07657
- 995 Zhang, S., Bernard, D., Khan, W. I., Kaplan, M. H., Bramson, J. L., & Wan, Y. (2009). CD4+ T-  
996 cell-mediated anti-tumor immunity can be uncoupled from autoimmunity via the  
997 STAT4/STAT6 signaling axis. *Eur J Immunol*, *39*(5), 1252-1259.  
998 doi:10.1002/eji.200839152
- 999 Zheng, G. X., Terry, J. M., Belgrader, P., Ryvkin, P., Bent, Z. W., Wilson, R., . . . Bielas, J. H.  
1000 (2017). Massively parallel digital transcriptional profiling of single cells. *Nat Commun*, *8*,  
1001 14049. doi:10.1038/ncomms14049  
1002  
1003

1004 **Non-standard abbreviations**

1005

1006 *Dct*<sup>-/-</sup>, dopamine tautomerase deficient

1007 DNFB, dinitrofluorobenzene

1008 LmTrp2, *Listeria monocytogenes* strain expressing Trp2

1009 MFI, median fluorescence intensity

1010 Treg, regulatory T cell

1011 Trp2, tyrosinase-related protein 2

1012 UMAP, uniform manifold approximation and projection

1013



## Supplemental figures

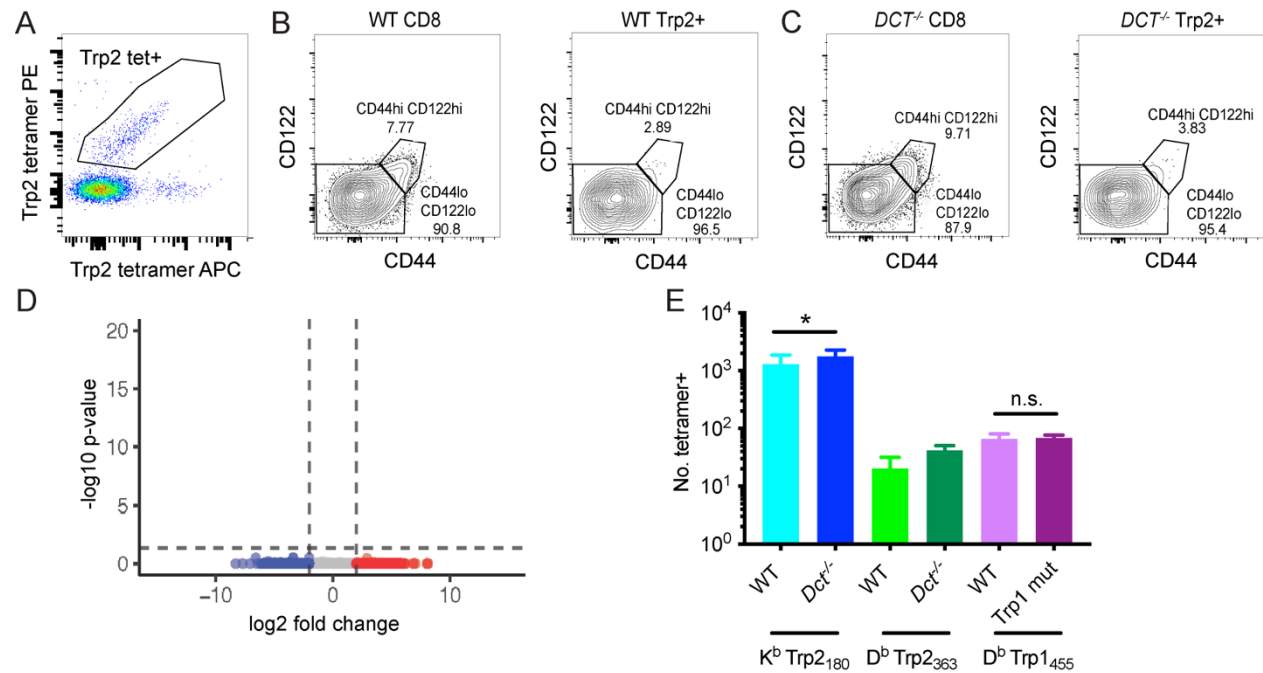

### Supplemental figure 1. Additional analysis of the Trp2/K<sup>b</sup>-specific population and cells specific for other melanocyte epitopes in pre-immune mice.

(A) Tetramer staining of pre-immune lymphocytes (enriched fraction, gated on live, dump-negative CD8<sup>+</sup> T cells). Dual tetramer staining was used to facilitate more accurate gating on antigen-specific cells. (B, C) CD44 and CD122 staining of pre-immune Trp2/K<sup>b</sup>-specific cells from a WT mouse (B) and a *Dct*<sup>-/-</sup> mouse (C). (D) Bulk RNA sequencing of Trp2/K<sup>b</sup>-specific CD8<sup>+</sup> T cells from pre-immune WT and *Dct*<sup>-/-</sup> mice was performed; differentially expressed genes were not identified between WT and *Dct*<sup>-/-</sup> samples as shown by the volcano plot. (E) Quantification of CD8<sup>+</sup> T cells specific for a D<sup>b</sup>-restricted Trp2 epitope and an epitope from tyrosinase-related protein 1 (Trp1) in pre-immune mice reveals a similar or slightly lesser number of cells in mice expressing antigen (WT mice) relative to those that do not. Samples used for tetramer enrichment of Trp1/D<sup>b</sup>-specific cells were obtained from shipped samples; accordingly, these data likely underestimate the precursor frequency. PC, principal component. \* p < .05 by one-way ANOVA with Sidak's multiple comparisons test.

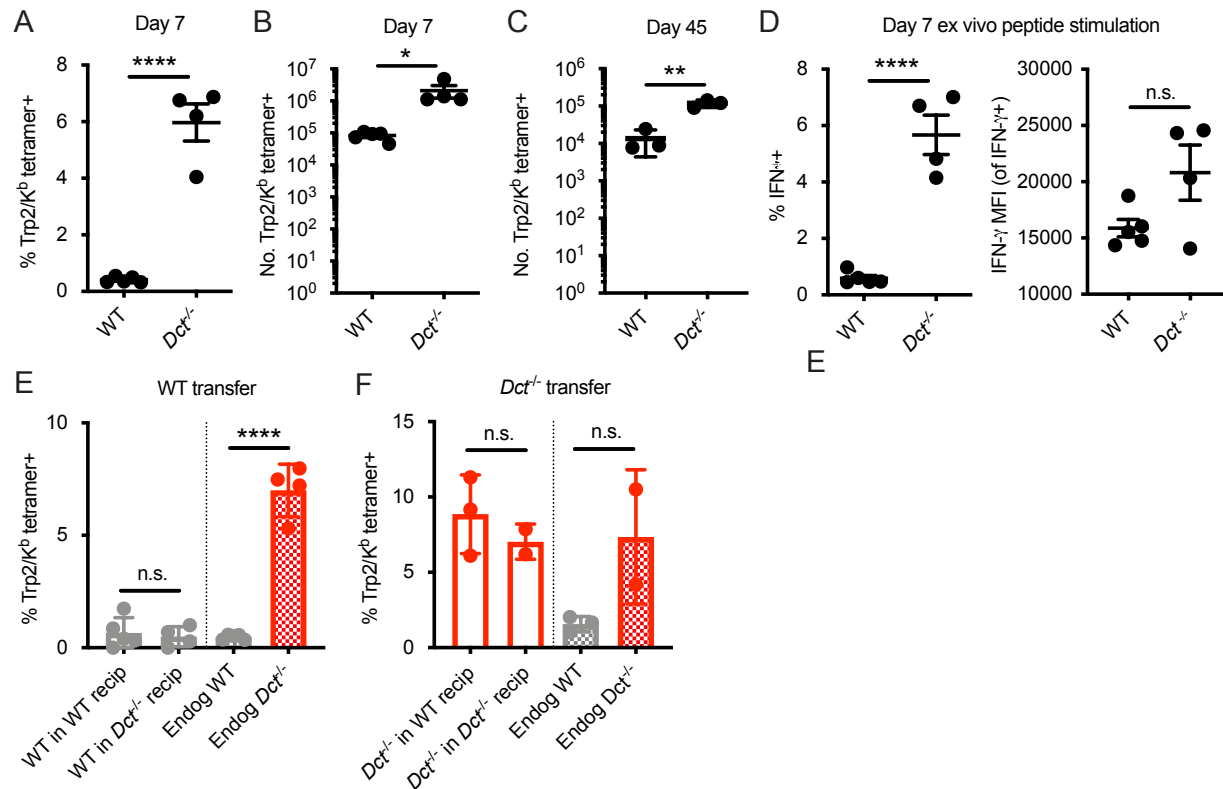

**Supplemental figure 2. Response to infection with LmTrp2 in primary and transfer settings**

Mice were infected with a recombinant *Listeria monocytogenes* strain expressing Trp2 (LmTrp2; A–D). The percent (A) or number (B, C) of splenic Trp2/K<sup>b</sup>-specific cells was assessed at the indicated day. (D) Day 7 splenocytes were stimulated for 4–6 hours with Trp2 peptide and intracellular staining was performed to assess cytokine production. (E, F) CD8<sup>+</sup> T cells from pre-immune WT or Dct<sup>-/-</sup> donors were negatively enriched and bulk CD8<sup>+</sup> T cells were transferred into congenically distinct WT or Dct<sup>-/-</sup> recipients. One day later, mice were infected with LmTrp2. Donor and endogenous cells were collected from the blood of recipient mice on day 7 following infection and assessed for Trp2/K<sup>b</sup> tetramer binding. Data in A, B, and D are representative of 3 similar experiments; data in C, E, and F represent individual experiments with 2–5 mice per group. Squares indicate male animals. \* p < 0.05, \*\* p < 0.01, \*\*\* p < 0.001, \*\*\*\* p < 0.0001 by unpaired t test (A–D) or one-way ANOVA with Sidak’s multiple comparisons test (E, F). Endog, endogenous; recip, recipients.

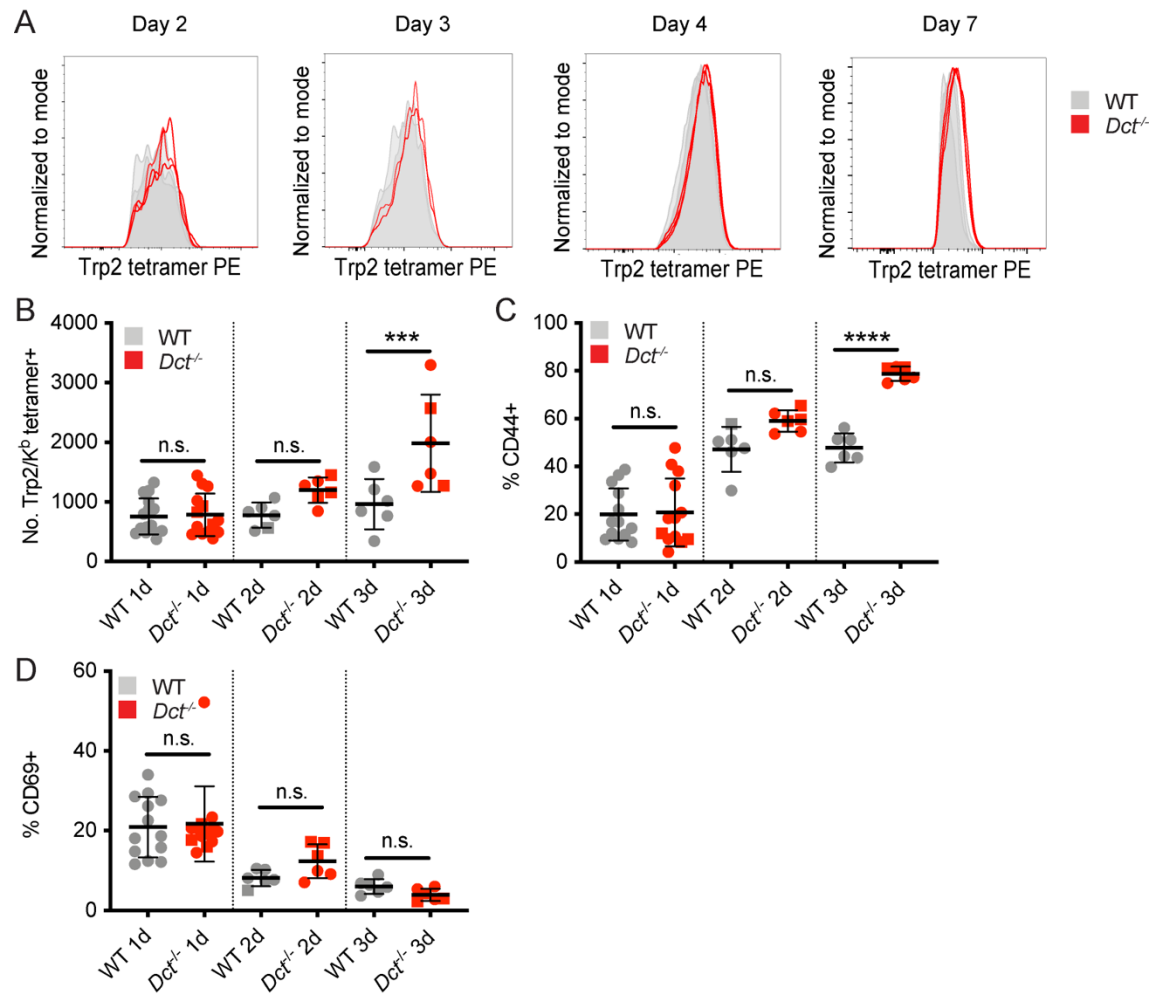

**Supplemental figure 3. Tetramer staining kinetics and response to peptide immunization.**

WT and *Dct*<sup>-/-</sup> mice received intravenous injections of 200 ug Trp2 peptide as part of TriVax (A) or alone (B–D). (A) Histograms of tetramer staining for Trp2/K<sup>b</sup>-binding cells. (B–D) Tetramer enrichment was used to enumerate Trp2/K<sup>b</sup>-specific cells and assess their phenotype at the indicated time points following peptide injection; males are indicated by square symbols. Data from representative experiments at each time point are shown in (A). Data in B–D are compiled from multiple experiments. \*\*\*  $p < 0.001$ , \*\*\*\*  $p < 0.0001$  by one-way ANOVA with Sidak's multiple comparisons test.

A

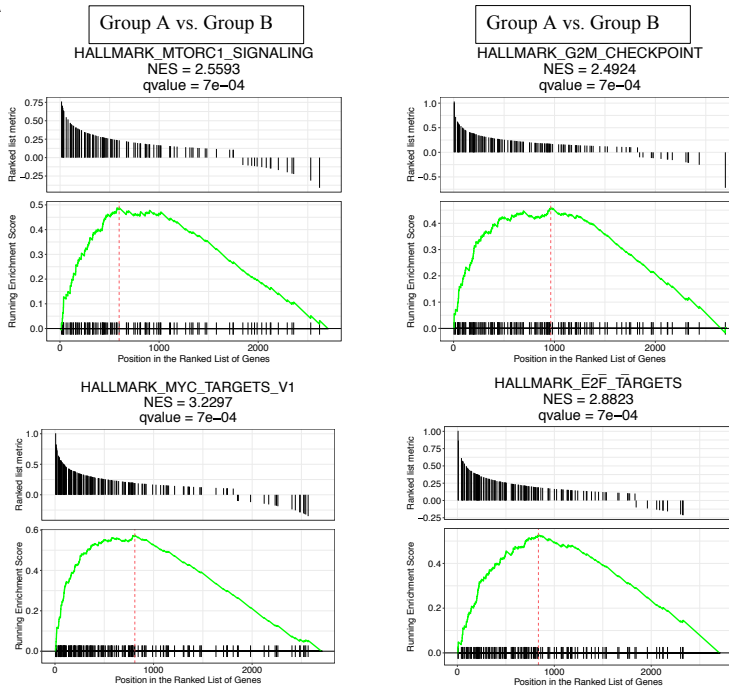

B

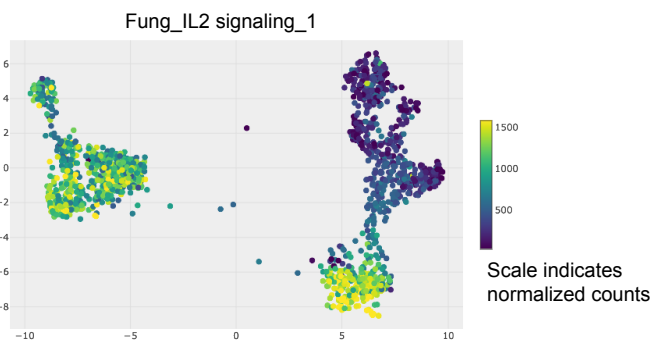

C

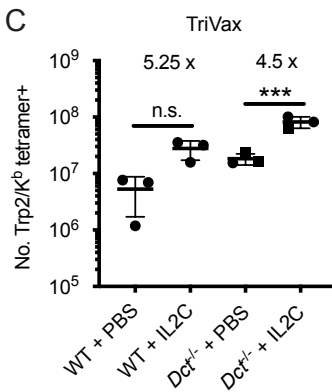

D

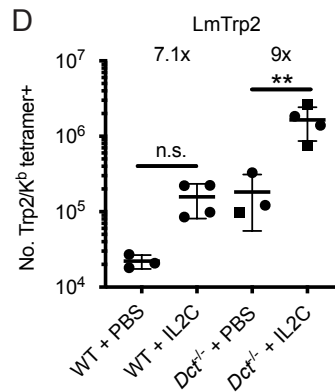

**Supplemental figure 4. GSEA of single-cell data and response of WT and *Dct*<sup>-/-</sup> Trp2/K<sup>b</sup>-specific cells to IL-2C**

(A) Gene set enrichment analysis (GSEA) plots show enrichment of the following gene sets in Group A: Myc targets, MTORC1 signaling, G2M checkpoint, E2F targets. (B) Enrichment between clusters and a dataset of genes involved in IL-2 signaling is indicated by color. (C, D) WT and *Dct*<sup>-/-</sup> mice were immunized with TriVax (C) or infected with LmTrp2 (D) and treated with PBS or IL-2C on day five. Trp2/K<sup>b</sup> tetramer positive splenocytes were enumerated on day seven after priming/infection. Squares indicate male animals. \*  $p < 0.05$ , \*\*\*\*  $p < 0.0001$  by one-way ANOVA with Tukey's multiple comparisons test. IL-2C, IL-2 complex.

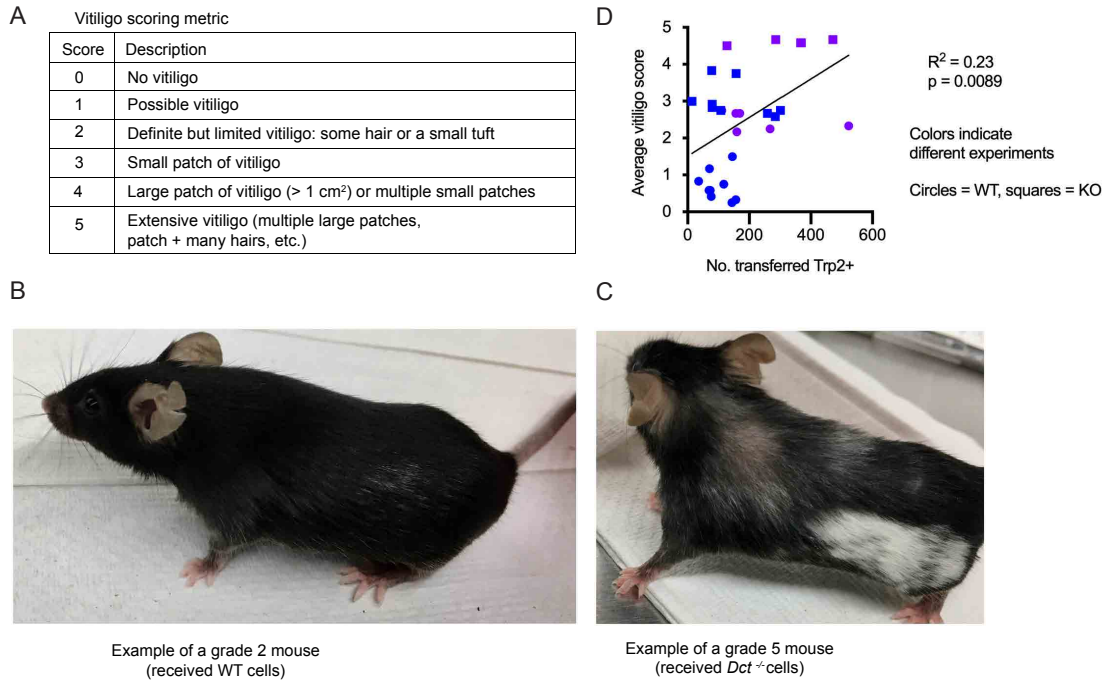

**Supplemental figure 5. Vitiligo scoring metric and correlation between the average vitiligo score and the number of transferred Trp2/K<sup>b</sup>-specific cells**

(A) Vitiligo scoring metric used to quantify the degree of vitiligo. (B) Example of a grade 2 mouse; (C) example of a grade 5 mouse. (D) Average vitiligo score per mouse (days 0–93) relative to the number of transferred Trp2/K<sup>b</sup> tetramer positive cells on day six after transfer and TriVax boost. Two compiled experiments are shown. Simple linear regression was used to fit a line and assign  $R^2$  and p-values.
